1  
2  
3  
4  
5  
6  
7  
8  
9  
10  
11  
12  
13  
14  
15

# Evolutionary dynamics of culturally transmitted, fertility-reducing traits

Dominik Wodarz<sup>1,2</sup>, Shaun Stipp<sup>2</sup>, and Natalia L. Komarova<sup>2,1</sup>

1: Department of Ecology and Evolutionary Biology, 321 Steinhaus Hall, University of California, Irvine, CA 92697

2: Department of Mathematics, 340 Rowland Hall, University of California, Irvine, CA 92617

contact: [dwodarz@uci.edu](mailto:dwodarz@uci.edu); 949-824-2531.

16

17 **Abstract**

18

19 Human populations in many countries have undergone a phase of demographic  
20 transition, characterized by a significant reduction in fertility at a time of increased  
21 resource availability. Typically, the reduction in fertility is preceded by a reduction in  
22 mortality and a consequent increase in population density. Various theories have been  
23 proposed to account for the demographic transition process, including maladaptation,  
24 increased parental investment in fewer offspring, and cultural evolution. Aspects of  
25 cultural evolutionary processes in relation to demographic transitions have been studied  
26 with mathematical models. The reason for the observation that fertility reduction tends  
27 to be preceded by a decline in mortality, however, remains poorly understood. Using a  
28 variety of mathematical modeling approaches, we show that the cultural selection of low  
29 fertility traits crucially depends on the population death rate: if mortality is relatively high,  
30 the trait fails to spread. If mortality is reduced, the trait can spread successfully, thus  
31 offering an explanation for the observed trends. Computer simulations can reproduce  
32 the central characteristics of the demographic transition process, including significant  
33 changes in reproductive behavior within only 1-3 generations. A model tracking the  
34 continuous evolution of reproduction rates through “errors” in the cultural transmission  
35 process predicts fertility to fall below replacement levels if death rates are sufficiently  
36 low. This can potentially explain the very low ideal family sizes in Western Europe.

37

38

## 39 **Introduction**

40 In the 19<sup>th</sup> century, some human populations displayed a demographic transition from  
41 relatively high fertility and high mortality towards a significantly reduced fertility and  
42 lower mortality [1-4]. This first occurred in more developed parts of the world, such as  
43 Europe, the United States, Japan, Australia, and New Zealand, and coincided with an  
44 overall increase in resource availability (judged by economic considerations). In  
45 Western European countries, fertility has declined below replacement levels since the  
46 1970s and 1980s [5,6], and this also applies to the perceived ideal family size. In  
47 German speaking countries the ideal family size has fallen below replacement levels,  
48 about 1.7 children [6].

49

50 Similarly, it has been observed that fertility reduction tends to be more  
51 pronounced in population segments that are economically advantaged than in poorer  
52 segments [1]. This is in contrast to trends observed before these demographic  
53 transitions, when increased wealth was associated with higher fertility [1,7].

54

55 An interesting characteristic of demographic transitions is that the reduction in  
56 fertility tends to be preceded by a reduction in the death rate of individuals, and by a  
57 consequent temporary population growth phase [4,8,9]. Transitions towards a reduced  
58 rate of reproduction following a rise in wealth and resources can be considered  
59 paradoxical, especially in the context of evolutionary biology [1,10]. According to

60 evolutionary thinking, individuals evolve to maximize their reproductive potential, and to  
61 translate increased resource availability into higher reproductive success.

62

63 A number of theories have been put forward to account for demographic  
64 transitions towards reduced fertility [1,11]. According to one line of argument, the  
65 transition to reduced fertility might be maladaptive. That is, humans employ behavioral  
66 strategies that used to be advantageous in previous times, but currently result in  
67 behaviors that are not adaptive due to recent significant changes in socio-economic  
68 factors. Another line of argument suggests reduced fertility to be adaptive, because the  
69 current environment favors the production of few offspring with large parental  
70 investment rather than the generation of more offspring with lesser parental investment  
71 per child. This might be a significant consideration in parts of the world where  
72 competition among individuals for jobs and careers is fierce. A third mechanism that  
73 has been invoked to explain the observed decline in fertility is non-genetic, cultural  
74 evolution. According to this argument, behavior that leads to reduced fertility in certain  
75 influential individuals is copied by other individuals in the population, resulting in a  
76 spread of this trait throughout the population. This explanation has the advantage that  
77 cultural evolution can occur on much faster time-scales than genetic evolution, which is  
78 required to account for the relatively fast observed rate of transition to lower fertilities in  
79 human populations.

80

81           The dynamics of cultural transmission have been studied extensively with  
82   mathematical models [12-19], and these approaches have also been applied to the  
83   analysis of demographic transitions and the evolution of small family sizes, in particular  
84   by the group of Marc Feldman [20-22]. In the simplest forms, such models are given by  
85   ordinary differential equations that describe the spread of the cultural trait, similar to  
86   infection models [12]. On a more complex level, age-structured models were formulated  
87   [20,21] showing that cultural transmission dynamics can result in demographic  
88   transitions on time scales that are similar to those observed in human data. The spread  
89   of cultural traits that affect fertility, survival, or both was investigated and the effect of  
90   these traits on the demographic structure of the population was investigated. The roles  
91   of vertical, oblique, and horizontal transmission of the trait were examined, and the  
92   models indicated that horizontal and oblique learning could accelerate the spread of the  
93   cultural trait, compared to vertical transmission alone [20]. In an earlier study, it was  
94   shown that cultural niche construction could be an important component that contributed  
95   to the transition to reduced fertilities [21]. According to this mechanism, the first trait to  
96   spread is one of valuing education, which provides an environment that promotes the  
97   spread of a second, fertility-reducing trait. If the trait of valuing education is further  
98   associated with reduced mortality of individuals, the model predicts that the decline in  
99   fertility is preceded by a reduction in the population death rate, as observed in  
100   demographic data. These models were examined further in the context of spatial  
101   population structure, formulated as niche construction models in metapopulations [22].

102

103           In these studies, the increased survival / lower death rate of the population was  
104 either considered a culturally transmitted trait (similar to fertility reduction), or it was  
105 coupled to a culturally transmitted trait, e.g. by assuming that appreciation of education  
106 correlates with increased viability. Here, we consider cultural transmission models  
107 where the population death rate is an independent, exogenous variable that can be  
108 modulated (reduced) over time, e.g. as a consequence of sanitary, medical or  
109 technological advances, and investigate the effect of such changes on the ability of a  
110 fertility-reducing trait to spread. We study the spread of the fertility-reducing trait in  
111 spatially structured and non-spatial models, as well as in models with and without age  
112 structure. We first consider a model with two populations, a fast and a slow reproducing  
113 one, and subsequently consider models where the reproduction strategy is a continuous  
114 trait. Because the overall death rate of individuals negatively correlates with the  
115 economic development and the amount of resources available to the population, this  
116 analysis sheds further light onto the correlation between resource availability and the  
117 rate of population growth.

118

119

## 120 **A two-dimensional agent-based model with asexual reproduction**

121 We begin by examining the spread of a fertility-reducing cultural trait with the help of a  
122 two-dimensional, stochastic agent-based model (ABM) that describes population  
123 dynamics on a 2D grid of size  $n \times n$ . We will refer to this model as ABM1. Two  
124 populations are considered which reproduce with a fast and slow rate, respectively.

125 During each time step (representing a generation), the grid is randomly sampled  $2M$   
126 times, where  $M$  is the total number of individuals currently present. When an individual  
127 is picked, it can undergo either a birth-death update, or a cultural transmission update  
128 (with equal probabilities). If the birth-death update is chosen, the individual reproduces  
129 with a probability  $R_f$  and  $R_s$ , depending on whether this is a fast or slow reproducer. A  
130 spot is chosen randomly from the eight nearest neighbors. If that target spot is empty,  
131 the offspring is placed there, otherwise, the reproduction event is aborted. With an  
132 independent probability  $D$ , the individual dies; both populations are assumed to have  
133 the same death rate.

134 During a cultural transmission update, the individual attempts to change its  
135 reproductive strategy with probability  $C$ . Given that the cultural transmission update is  
136 attempted, the actual change by cultural transmission occurs with the probability defined  
137 by the prevalence of individuals with the opposite strategy among the 8 nearest  
138 neighbors (including the individual under consideration), see below for more details. The  
139 ratio of the constant  $C$  to the mean division rate roughly measures prevalence of cultural  
140 transmission in the population; it roughly corresponds to the fraction of the individuals in  
141 each generation that attempt to change their reproductive strategy based on their  
142 neighbors' strategy.

143 A cultural update is performed by gathering the information on the reproductive  
144 strategy of the individuals' neighbors, similar to voter models [17,23]. In our model,  
145 however, we assume that slow reproducers are more effective at changing a fast  
146 reproducer's strategy than vice versa. In particular, when adding up the number of fast  
147 and slow reproducers in the neighborhood, there is a probability  $Q < 1$  that a fast

148 reproducer is taken into account, while all slow reproducers are always included. This  
149 reflects the assumption that the opinion of a slow reproducer is more influential than that  
150 of a fast reproducer. This modeling choice is motivated by the assumption that slow  
151 reproducers tend to channel the resources available to them into accumulation of wealth  
152 and/or social status, and thus they may appear as more attractive models for imitation.

153

## 154 **Outcomes of computer simulations for model ABM1**

155 We first discuss the effect of the two components underlying the model: the birth-death  
156 process and the cultural transmission process. If the model is run with only the  
157 reproduction and death processes (without cultural transmission), the only outcome is  
158 the persistence of the fast reproducing population and the competitive exclusion of the  
159 slower reproducing one. This is straightforward competition dynamics behavior, which  
160 underscores the notion that a slower rate of reproduction is a disadvantageous strategy.  
161 If the model is run with only cultural transmission (no reproduction and death, but a  
162 constant population), it essentially becomes a voter model, where “slow” and “fast” are  
163 different opinions held by individuals in the population. As has been described for such  
164 models [17,23], the only eventual outcome is that every individual in the population has  
165 the same opinion. Which of the two opinions wins, depends on drift dynamics and  
166 hence on initial frequencies of the opinions in the population.

167

168 When both processes are included, more complex dynamics are observed. Now three  
169 outcomes are possible (Figure 1): the fast reproducers win and exclude the slow



170 reproducers; the slow reproducers win and exclude the fast reproducers; both  
171 populations coexist in the longer term. Since we study stochastic models, the only  
172 eventual outcome is extinction. In what we call “coexistence”, the time until one of the  
173 populations goes extinct is significantly longer than in the parameter regimes we call  
174 “exclusion” (compare Figure 1C to 1A &B). Which outcome is observed depends on  
175 several model parameters, most notably the death rate of agents,  $D$ . This is shown in  
176 Figure 2Ai. Each point on this graph depicts the time until one of the populations goes  
177 extinct, depending on the death probability,  $D$ . The outcomes are color-coded: purple  
178 depicts fast reproducers remaining, and green slow reproducers. At higher death rates,  
179 the fast reproducers persist and extinction of the slow reproduces occurs at relatively  
180 short time scales. At low death rates, the slow reproducers persist and the fast  
181 reproducers go extinct on a relatively short time scale. At intermediate death rates, the  
182 time to extinction of one of the populations rises sharply, and either population has a  
183 chance to go extinct first. This corresponds to the coexistence regime. Therefore, lower  
184 death rates among individuals in the population create conditions in which the cultural  
185 transmission of the slow reproduction trait is successful, resulting in an overall reduced  
186 level of fertility.

187

188 Other parameters further modulate the outcome of the dynamics. Cultural  
189 transmission of the low fertility trait is promoted by lower values of  $Q$ , i.e. by a reduced  
190 influence of fast reproducers on choosing the reproduction strategy during the cultural  
191 transmission procedure. Increasing the value of  $Q$  results in a lower population death  
192 rate that is required for cultural transmission to be successful (Figure 2Aii). The relative

193 probability for a cultural transmission event to take place,  $C$ , is also an important  
194 determinant of outcome. As expected, higher values of  $C$  promote the cultural spread of  
195 the fertility-reducing trait. For lower values of  $C$ , lower population death rates are  
196 needed for cultural transmission to be successful (Figure 2Aiii).

197

198

### 199 **Including age structure into the agent-based model**

200 Rather than considering fast versus slow reproducers, we now modify the agent-based  
201 model to consider early versus late reproducers. This model will be referred to as  
202 ABM2. While these two concepts are related, a reduction in fertility due to a later age of  
203 first reproduction might be relevant to current times where segments of the population  
204 with higher degrees of education and more wealth tend to reproduce at later ages. In  
205 the agent-based model, we therefore consider four age classes. Individuals are born  
206 into age-class 1, at which no reproduction is possible. During each time step, all  
207 individuals age by one time unit. After  $A$  time units, an individual advances to the next  
208 age class. Reproduction can occur in age classes 2 and 3 for early reproducers, and  
209 only in age class 3 for late reproducers. In either case, reproduction occurs with a  
210 probability  $R$ . Age class 4 is a post-reproductive phase, during which the only event that  
211 can occur is death. Death can occur in all age classes, but with increasing probabilities  
212 for successive age classes, i.e. with probabilities  $D_4 > D_3 > D_2 > D_1$ . This model has the  
213 same properties as the previous one, where we distinguished between slow and fast  
214 reproducers. We again observe three possible outcomes: extinction of either early or

215 late reproducers, or longer-term coexistence (not shown). The influence of parameters  
216 on outcome is also the same on a qualitative level. Importantly, the death rate of  
217 individuals is again a key determinant of outcome. Since in this model there are different  
218 death rates for the different age classes, we multiplied all of the death rates by a factor  
219  $F$ , which means that all death rates change by the same amount. In Figure 2B, we  
220 plotted the outcome of the dynamics for increasing values of  $F$ , which corresponds to  
221 increasingly higher population death rates. Again, each point depicts the time until one  
222 of the two populations goes extinct. We observe the same trend as before. For higher  
223 population death rates, the fast reproducers remain. For low death rates, the slow  
224 reproducers remain. For intermediate death rates, we observe coexistence, indicated by  
225 a sharp rise in the time to extinction, where either fast or slow reproducers have a  
226 chance to persist.

227

228

## 229 **Complete mixing versus spatial constraints**

230 The spatial nature of the models explored above makes it difficult to obtain analytical  
231 insights. In this section, we formulate the same processes under the assumption that  
232 individuals mix well. Spatial constraints are most relevant to the cultural transmission  
233 aspect of the model because people are most likely to communicate with and consider  
234 the opinion of neighboring individuals. Mixing, however, can be assumed if populations  
235 are relatively small or information travels more easily through populations.

236

237 **Fast and slow reproducers.** First, we again consider two types of individuals that differ  
238 by their reproduction rates. In the context of well-mixed populations, this can be  
239 described by ordinary differential equations (see Section 1 of the Supplement for more  
240 details of the analysis). Denoting fast reproducers by  $x_f$  and slow reproducers by  $x_s$ , the  
241 model can be written as follows:

$$\begin{aligned} \dot{x}_f &= r_f x_f W - dx_f - \beta x_f \frac{x_s}{x_s + \gamma x_f} + \beta x_s \frac{\gamma x_f}{x_s + \gamma x_f} \\ \dot{x}_s &= r_s x_s W - dx_s + \beta x_f \frac{x_s}{x_s + \gamma x_f} - \beta x_s \frac{\gamma x_f}{x_s + \gamma x_f}, \end{aligned}$$

242  
243 where  $W = 1 - \frac{x_f + x_s}{K}$  introduces density dependence, limited by the carrying capacity  
244  $K$ . Hence, both populations grow logistically and are in competition with each other, and  
245 die with a rate  $d$  (assumed to be the same for slow and fast reproducers). The rate at  
246 which individuals change opinion through cultural transmission (fast reproducers  
247 becoming slow and vice versa) is proportional to the weighted fraction of the individuals  
248 with the opposite opinion in the whole population, multiplied by the rate constant  $\beta$ . (For  
249 comparison, in the spatial setting, the probability to change opinion was proportional to  
250 the weighted fraction of the individuals with the opposite viewpoint among only the  
251 nearest neighbors). The coefficient  $\gamma < 1$  indicates the degree to which the influence of  
252 fast reproducers is reduced compared to that of slow reproducers. The equations above  
253 simplify to the following system:

254

$$\dot{x}_f = r_f x_f W - dx_f - \beta(1-\gamma) \frac{x_f x_s}{x_s + \gamma x_f},$$

$$\dot{x}_s = r_s x_s W - dx_s + \beta(1-\gamma) \frac{x_f x_s}{x_s + \gamma x_f}.$$

255 Another way to model the process of differential strategy switching is to assume simply  
 256 that cultural transmission is more effective from slow to fast reproducers than vice  
 257 versa. This can be expressed as

258

$$\dot{x}_f = r_f x_f W - dx_f - \beta_s x_f \frac{x_s}{x_s + x_f} + \beta_f x_s \frac{x_f}{x_s + x_f}$$

$$\dot{x}_s = r_s x_s W - dx_s + \beta_s x_f \frac{x_s}{x_s + x_f} - \beta_f x_s \frac{x_f}{x_s + x_f},$$

259 where, importantly,  $\beta_s > \beta_f$ . If we denote  $\beta = \beta_s - \beta_f$ , then the model can be re-written as

260

$$\dot{x}_f = r_f x_f W - dx_f - \beta x_f \frac{x_s}{x_s + x_f}$$

$$\dot{x}_s = r_s x_s W - dx_s + \beta x_f \frac{x_s}{x_s + x_f}.$$

261 The formulation of the cultural transmission dynamics is now equivalent to an infection  
 262 model with frequency-dependent infection terms [12,24]. It turns out that for our  
 263 analysis, the frequency dependence is not essential, and we can assume that switching  
 264 occurs at a rate proportional to the abundance of the opposite type (scaled by the  
 265 carrying capacity  $K$ ), not its fraction in the population. Hence, we also consider the  
 266 following version of the model:

$$\begin{aligned} \dot{x}_f &= r_f x_f W - dx_f - \frac{\beta x_f x_s}{K} \\ \dot{x}_s &= r_s x_s W - dx_s + \frac{\beta x_f x_s}{K}. \end{aligned}$$

In the Supplement we demonstrate that all three versions of the model lead to very similar conclusions. Here we show the results for the latter system, which is the simplest, and which will be subsequently referred to as the “ODE model”. If the reproduction rates are larger than the death rates ( $r_f > d$ ,  $r_s > d$ ), the model is characterized by three equilibria:

**(i)** Fast reproducers win and slow reproducers go extinct, with equilibrium expressions

given by  $x_f = K(1 - d/r_f)$ ,  $x_s = 0$ . This equilibrium is stable if  $d > d_1 \equiv \frac{r_1}{1 + (r_1 - r_2)/\beta}$ .

**(ii)** Slow reproducers win and fast reproducers go extinct. The equilibrium expressions

are given by  $x_f = 0$ ,  $x_s = K(1 - d/r_s)$ . The solution is stable if  $d < d_2 \equiv \frac{r_s}{1 + (r_f - r_s)/\beta}$ .

**(iii)** Coexistence of fast and slow reproducers is described by the following equilibrium

expressions:  $x_f = \frac{K}{\beta}(d - d_2)$ ,  $x_s = \frac{K}{\beta}(d_1 - d)$ . This is stable if  $d_2 < d < d_1$ .

279

Therefore, similar to the corresponding spatial agent-based model, fast reproducers are only expected to dominate for relatively large population death rates. Lower death rates result in coexistence, and even lower death rates lead to the exclusive persistence of slow reproducers.

284

285           These results make intuitive sense in the context of the infection dynamics  
286 literature [25,26]. As the death rate of the population is decreased, the population  
287 density increases until it is large enough to allow the slow reproduction meme to spread.  
288 Essentially, a lower death rate increases the basic reproductive ratio of the slow  
289 reproduction trait above unity, allowing invasion. The less the difference between the  
290 strength of cultural trait transmission from fast→slow compared to slow→fast, the lower  
291 the death rate,  $d$ , has to be (and hence the higher the population density has to be) to  
292 allow the spread of the slow reproduction trait. Similarly, the larger the fitness difference  
293 between slow and fast reproducers ( $r_f - r_s$ ), the lower the death rate  $d$  has to be to allow  
294 spread of the slow reproduction trait.

295

296   **Age structure in a well-mixed model.** An alternative approach is to consider a non-  
297 spatial, age structured model [27]. We will model the competition dynamics of two types  
298 that differ by their reproductive strategies (see Section 2 of the Supplement for  
299 analytical results). Assume the existence of  $N$  discrete age groups for the two types,  
300 and denote the abundance of type  $s$  in age group  $i$  as  $x_i^{(s)}$ . Reproduction behavior of  
301 type  $s$  is described by reproduction rates in each age group,  $a_i^{(s)}$ . These quantities  
302 comprise the information on the reproductive strategy (how early this type is willing to  
303 start reproducing), and also the biological variation in fecundity (e.g. the assumption that  
304 fecundity may decline with age). We assume that individuals of type  $s=2$  have a  
305 tendency to reproduce later than individuals of type  $s=1$ . We can formulate a discrete  
306 time dynamical system for these populations as follows:

307 
$$x_1^{(s)}(t+1) = \sum_{i=1}^N a_i^{(s)} x_i^{(s)}(t) W, \quad (1)$$

$$x_j^{(s)}(t+1) = w_{j-1}^{(s)} x_{j-1}^{(s)}(t) (1 - \beta_j^{(s)} v_j^{(3-s)}(t)) + w_{j-1}^{(3-s)} x_{j-1}^{(3-s)}(t) \beta_j^{(3-s)} v_j^{(s)}, \quad 1 < j \leq N \quad (2)$$

308 Here, the first equation describes the creation of newborn individuals of type  $s$  by older  
 309 individuals, where each age group reproduces with intensity  $a_i^{(s)}$  and reproduction is

310 density-dependent, described by term  $W$ , e.g.  $W = \left( 1 + \sum_{s=1}^2 \sum_{k=1}^N x_k^{(s)} / K \right)^{-1}$ , with parameter  $K$

311 having the meaning of carrying capacity. The rest of the equations describe (i) the  
 312 population moving from age group to age group, and (ii) the imitation dynamics.

313 Coefficients  $w_{i-1}^{(s)}$  describe the probability for an individual of type  $s$  in age group  $j-1$  to  
 314 survive until age  $j$ . The probability of switching type (imitation) is described by terms

315 including coefficients  $\beta$ . First we note that expression  $3-s$  simply means “the other

316 type”, as  $3-s$  returns 1 for  $s=2$  and it returns 2 for  $s=1$ . Further, the probability to switch

317 from type  $s$  to type  $3-s$  while transitioning to age group  $j$  is given by  $\beta_j^{(s)} v_j^{(3-s)}$ , where

318 
$$v_j^{(3-s)} = \frac{\sum_{k=j}^N x_k^{(3-s)}(t)}{\sum_{k=j}^N (x_k^{(3-s)}(t) + x_k^{(s)}(t))},$$

319 and is proportional to the fraction of individuals of age  $j$  and older that belong to “the

320 other type”. We can see that the first term on the right of equation (2) multiplies the

321 probability that an individual does not switch to the other type, and the second term

322 multiplies the probability that switching from  $3-s$  to  $s$  occurs.



323           Generally, the behavior of this discrete dynamical system can be quite complex,  
324 and depending on the parameters we see exclusion equilibria (when one type is extinct  
325 and the other reaches a steady positive equilibrium), exclusion periodic solutions (again,  
326 one of the types is extinct and the other enters a steady cycle), and coexistence states  
327 (where both types are present, and may reach a steady state or a cycle). To draw the  
328 parallel between this model and those considered above, we note that parameters  $w_{i-1}^{(s)}$   
329 are responsible for survival to the next age group, and thus increasing these quantities  
330 is similar to decreasing the death rate in the previous models. We observe that exactly  
331 as before, large death rates favor the survival and dominance of the early reproducers,  
332 and small death rates lead to the exclusion of early reproducers by late reproducers.

333           Intuitively, this result can be explained as follows. Assume for simplicity that the  
334 transfer rate,  $\beta$ , does not depend on the age group, and the survival probability,  $w$ , is  
335 identical for all age groups and for both types. Fitness of each of the types is comprised  
336 of their net fecundity and their propensity to remain within their type (and not transfer to  
337 the opposite type). In the absence of imitation (transfer), clearly, the fitness of type 1 is  
338 larger than that of type 2. But this can be offset by a larger probability of transfer (if we  
339 assume that  $\beta^{(1)}$  is larger than  $\beta^{(2)}$  by a sufficient margin). Small death rates (and  
340 therefore large values of  $w$ ) work against type 1 individuals and benefit type 2  
341 individuals. If  $w$  is large, more individuals survive to later stages, and thus type 2 has a  
342 better chance to reproduce. Further, for larger values of  $w$ , there will be a larger influx of  
343 individuals transferring from type 1 to type 2: they simply have a longer time to stay  
344 alive and decide to switch. Thus, living longer adds fitness to type 2, such that after a  
345 threshold of  $w$ , type 2 becomes stronger and drives type 1 extinct.

346 Note that many other modeling choices can be made, which are described in the  
347 Supplement. The general trends described here are robust and do not depend on  
348 details on modeling choices. Analytical calculations for certain simple cases are also  
349 presented in the Supplement.

350

351

### 352 **Reproductive strategy as a continuous trait**

353 In this section, we return to the spatial model, but modify the assumptions. So far, we  
354 considered a population of slow and fast reproducers, where slow reproducers could  
355 switch to fast reproducers and vice versa. Switching occurred with a probability that was  
356 proportional to the weighed fraction of the opposing strategy among neighboring  
357 individuals. Rather than considering two discrete reproductive strategies, however, it is  
358 more realistic to assume the probability of reproduction to be a continuous variable. This  
359 model will be called ABM3. We again assume that an individual is chosen for a cultural  
360 transmission event with a probability scaled with  $C$ . In this model, however, instead of  
361 adopting (or rejecting) the reproductive probability of the opposite type, the individual  
362 adopts the weighted average of the reproduction probabilities among all neighbors  
363 (including its own reproduction probability). As in the above models, we assume that  
364 slower reproducers are more influential and contribute more to cultural transmission  
365 than faster reproducers. This is implemented during the averaging procedures across  
366 the neighborhood: we weigh the reproduction probability by a factor  $Q < 1$  if the

367 reproduction probability of a neighbor is faster than that of the individual under  
368 consideration.

369         The outcome observed in this model is straightforward. As initial conditions, the  
370 individuals in the system are characterized by different reproduction probabilities. Over  
371 time, the reproduction probabilities converge to a spatially uniform value, the level of  
372 which depends on the initially assigned probabilities. The reason for this eventual  
373 uniformity is the assumption that an individual adopts the average reproduction  
374 probability of the neighborhood during a cultural transmission event.

375

376         Next, we introduce “mutations” that can occur during cultural transmission.  
377 Instead of simply adopting the (weighted) average strategy of the neighborhood, with  
378 probability  $u$  individuals would modify this strategy by increasing or decreasing it (with  
379 equal probabilities) by a fraction  $G$ . We examined the evolution of the average  
380 reproduction probability,  $R$ , over time, by running computer simulations, and the  
381 following outcomes were observed (Figure 3): (i) The average probability to reproduce,  
382  $R$ , increases steadily towards the maximum possible value ( $R+D=1$ ), shown by the  
383 purple, green, and red lines in Figure 3. (Simulations were stopped when  $R+D=1$ ). (ii)  
384 The average probability to reproduce declines steadily, eventually resulting in  
385 population extinction, shown by the dark blue, light blue, and pink lines in Figure 3.  
386 Extinction occurs because the reproduction rate evolves to levels that are too low to  
387 maintain the population. (iii) The average probability to reproduce converges to an  
388 intermediate level, and fluctuates around this level, shown by the yellow and orange  
389 lines in Figure 3. This level is independent of the starting value of  $R$  (not shown).

390 Parameter values determine which outcome is observed. As before, the population  
391 death probability,  $D$ , is a crucial factor (Figure 3). Evolution to maximal reproduction  
392 probabilities,  $R$ , is seen for relatively large death rates. Evolution towards low values of  
393  $R$  and hence population extinction is observed for relatively low death rates. This could  
394 be the cultural equivalent to “evolutionary suicide” or “Darwinian extinction” [28].  
395 Evolution towards an intermediate reproduction probability is observed for intermediate  
396 death probabilities,  $D$ . A higher probability of cultural transmission,  $C$ , and a lower  
397 weight of faster reproducers during the averaging process,  $Q$ , further promote evolution  
398 towards declining reproduction rates and population extinction (not shown). Section 3 of  
399 the Supplement further explains the existence of an equilibrium state and explores how  
400 the mean population reproduction rate depends on parameters.

401

402

### 403 **Model with sexual reproduction**

404 So far, all models considered assumed asexual reproduction, which is an obvious  
405 oversimplification when considering human populations. Here, we repeat the analysis of  
406 the last section by introducing sexual reproduction into this modeling framework,  
407 referred to as ABM4. The same model as in the last section will be used, assuming the  
408 probability of reproduction to be a continuous trait, and also assuming that for a cultural  
409 transmission updates, a given individual adopts the weighted average reproduction  
410 probability of the neighborhood with the possibility of “mutations” as defined above.  
411 Sexual reproduction is incorporated in the following way. Two genders are

412 distinguished, gender 1 and gender 2. Before reproduction can occur, two individuals of  
413 opposing gender have to form an exclusive connection, thus assuming monogamy. The  
414 following events can occur if an individual is chosen for a reproductive update. If the  
415 individual does not have a partner, a connection can be formed with a probability  $M$  if an  
416 individual of the opposite gender without a partner is present among the eight nearest  
417 neighbors. The partner is randomly chosen from the neighborhood. If the individual  
418 does have a partner, reproduction happens with a probability  $R_{av}$ , which represents the  
419 average reproduction probabilities of the two parents. For simplicity, it is assumed that  
420 once formed, a partnership cannot break, corresponding to life-long monogamy. The  
421 offspring resulting from this partnership are assigned to one of the genders with a 0.5  
422 probability. The reproduction probability of the offspring is given by the average values  
423 of the two parents. The offspring is placed into a randomly chosen empty spot among  
424 the eight nearest neighbors of the parent that was originally picked for reproduction. If  
425 no empty spots exist within the immediate neighborhood, reproduction is not successful.  
426 Potential issues of mate preference for individuals with similar reproduction probabilities  
427 are not taken into account. Death occurs with a probability  $D$ , according to the same  
428 rules as described before.

429           As shown in Figure 4, the outcomes are qualitatively the same as in the  
430 corresponding model without sexual reproduction, described in the previous section. For  
431 relatively low population death rates, the reproduction probability can evolve towards  
432 reduced values until population extinction occurs. For relatively high death rates, the  
433 reproduction probability can evolve towards maximal values. For intermediate death  
434 rates, the population can fluctuate around an intermediate reproduction probability.

435

436

## 437 **Simulating demographic transitions in growing populations**

438 In the modeling approaches described so far, competition is a major driving force of  
439 outcome. In the absence of cultural transmission, faster or earlier reproducing  
440 populations outcompeted the slower or later reproducing ones. Cultural transmission  
441 could reverse the outcome of the competition if individuals were more likely to learn  
442 from slower rather than faster reproducers. Competition, however, is most prevalent if  
443 populations are close to an equilibrium or carrying capacity, which was the case in the  
444 above analysis. The patterns reported above are not observed in exponentially growing  
445 populations, because of the absence of competition (not shown). Because human  
446 populations have been growing, it is important to re-visit the above-explored processes  
447 in the context of unbounded population growth. While the population grows, individuals  
448 can still compete on a local level. Therefore, we consider a growing population that is  
449 subdivided into neighborhoods or demes. In each deme, the dynamics are modeled in  
450 the same way as in the previous sections, imposing a carrying capacity for each deme.  
451 For simplicity, we assume that in each deme, the dynamics are governed by the ODE  
452 model. As initial conditions, a single deme is populated with a majority of fast  
453 reproducers and a minority of slow reproducers. At the end of each time unit, there is a  
454 chance that a new, empty deme is founded into which a fraction of current population  
455 moves. The probability of this occurring is proportional to how full the current deme is. In  
456 addition, the probability to found a new deme is inversely proportional to the number of

457 existing demes. While the demes are not arranged spatially in this model, founding a  
458 new deme can be thought of as an increase in the density of the population, which gets  
459 more difficult the more demes already exist. Hence, the probability for members of an  
460 individual deme to found a new deme is given by  $\frac{\alpha(x_f + x_s)}{K(\epsilon N + 1)}$ , where  $N$  is the number of  
461 currently populated demes,  $x_f$  and  $x_s$  represent local population sizes of fast and slow  
462 reproducers,  $K$  is the local carrying capacity, and  $\alpha$  and  $\epsilon$  are constants. When a new  
463 deme is founded, a given fraction of both fast and slow reproducers moves into the new  
464 deme. As more demes become populated, the same algorithm is applied to every deme  
465 after each time unit.

466

467 In this model, we observe persistence of one type and exclusion of the other,  
468 while the population continues to grow (Figure 5A,B). As before, the fast population  
469 persist for fast overall death rates (Figure 5A), while the slow population persists for low  
470 overall death rates (Figure 5B).

471

472 We further used this model to simulate the demographic transition process  
473 (Figure 5C). The simulation was run as before, but at a defined time point in the  
474 simulation, the death rate is continuously and gradually reduced over several time steps  
475 towards a lower, new level. This exogenous reduction is shown by the grey line and is  
476 assumed to correspond to an improvement in various socio-economic factors that  
477 reduce mortality, such as an improvement in disease treatment, sanitary conditions,

478 technological innovations, etc. The fast reproducing population is shown in purple, the  
479 slow-reproducing population is green, and the total population size is shown by the red  
480 dashed line. Initially, the overall population death rate is relatively high, and the fast  
481 reproducing individuals enjoy a growth advantage. The average reproduction rate is  
482 shown by the black line and is driven by the fast-reproducing population. When the  
483 death rate is reduced, the fertility-reducing cultural trait can spread successfully and  
484 eventually becomes the dominant population. As the death rate declines, we observe a  
485 phase of faster population growth, as observed in data on demographic transitions [9].  
486 Following a time delay after the reduction in the death rate, the reproduction rate also  
487 declines, which is again consistent with data on demographic transitions [9] (this is also  
488 seen in a zoomed-in graph in Figure 5D). The exact timing of events depends on model  
489 parameters. For the purpose of this simulation, we chose parameters such that it takes  
490 about 5 generations to reduce the reproduction rate two-fold. This is an order of  
491 magnitude that is similar to events observed in human populations [1] and shows that  
492 the cultural transmission dynamics underlying our model can lead to sufficiently rapid  
493 changes in fertility. A faster rate of cultural transmission (higher value of  $\beta$ ) can lead to  
494 more rapid changes in fertility following the decline in the death rate, while the opposite  
495 holds true for slower rates of cultural transmission.

496

497

498

499



## 500 **Discussion and Conclusion**

501 We have used a variety of modeling approaches to investigate the basic dynamics by  
502 which a fertility-reducing trait can spread via cultural transmission. A central result was  
503 that lower population death rates select for the cultural spread of the low-fertility trait.  
504 In a first set of models, the dynamics of two populations were followed, which were  
505 fast/slow or early/late reproducers in age structured models. This was done both in the  
506 context of nearest neighbor interactions and assuming perfect mixing. Both  
507 assumptions have value, depending on the population size and the connectivity of  
508 communication networks among individuals; in application to the modern population  
509 dynamics, a complete mixing assumption may correspond to the role of media in  
510 opinion spread. In a second set of models, the reproduction rate was modeled as a  
511 continuous trait, and cultural transmission corresponded to an individual adopting the  
512 (weighted) average reproduction rate found within the neighborhood. Assumptions  
513 about inaccuracies during cultural transmission allowed us to study the evolution of the  
514 average reproduction rate over time. In accordance with the simpler models, faster  
515 death rates resulted in evolution towards maximal reproduction rates, while lower death  
516 rates resulted in evolution towards ever decreasing reproduction rates, which likely  
517 induced in population extinction. Intermediate death rates were found to result in the  
518 evolution towards intermediate reproduction rates. These results were true both for  
519 asexual and sexual reproduction in the models.

520

521           Competition among individuals was a major driving force underlying the  
522 dynamics arising from the model. While in the simpler settings explored here,  
523 competition correlated with populations being close to carrying capacity, we showed  
524 how a deme model can give rise to the same outcomes in populations that continuously  
525 grow without converging to a carrying capacity. Hence, the results described throughout  
526 the paper may hold for growing populations. We demonstrated that, depending on  
527 parameters, the model can reproduce crucial features of the “demographic transition  
528 model” [9].

529

530           Our study complements previous mathematical work that analyzed the cultural  
531 spread of small family sizes in relation to demographic transitions [20-22]. Our models  
532 consider a simpler setting involving the basic spread dynamics of the fertility reducing  
533 trait, similar to infection models. The result that lower death rates promote the cultural  
534 spread of the low fertility trait is intuitive if considered in the broader context of infection  
535 dynamics models: lower death rates of individuals increase population density, and this  
536 increases the basic reproductive ratio of the infection [26]. In the context of the  
537 demographic transition towards reduced fertility, this is nevertheless an interesting  
538 result. First, it might provide a simple explanation for the typical observation that a  
539 reduction in fertility is preceded by a reduction in mortality, which our model reproduced.  
540 In addition, the dynamics exhibited by these models suggest that fertility can be  
541 characterized by density dependence, even in the context of increased resource  
542 availability and continuously growing populations. Data indicate that fertility as well as

543 family size preference are characterized by density dependence, the reasons for which  
544 are not fully understood [29].

545

546 An interesting result in our models was that for low population death rates, the  
547 average reproduction rate of the population can continuously decline towards levels that  
548 cannot sustain persistence anymore. In Western European countries, fertility has  
549 declined below replacement levels since the 1970s and 1980s [5,6]. In addition, recent  
550 surveys [6] have revealed that the ideal family size in German speaking countries has  
551 fallen below replacement levels, about 1.7 children, among younger people, indicating  
552 that this trend might continue in the future. These trends could be the result of the type  
553 of cultural evolutionary dynamics explored here.

554

555 Some processes in the more complex versions of the models considered here  
556 could also be formulated in slightly different ways. In ABM3 and ABM4, cultural  
557 transmission involves the calculation of the weighted average reproduction rate among  
558 individuals within the immediate neighborhood. The assumption was made that  
559 individuals with a faster reproduction rate than the agent under consideration count less  
560 in this process, irrespective of the magnitude of this difference. Alternatively, it could be  
561 assumed that the reduced weight is proportional to the difference in reproduction rates,  
562 thus taking into account the distance in social hierarchies. While it seems reasonable to  
563 assume that economically more successful individuals carry more weight in cultural  
564 transmission than individuals who are less successful [30,31], the details of this are not

565 well understood [32,33]. We note that results reported here depend on the assumption  
566 that individuals with lower reproduction rates carry more social weight, an assumption  
567 that has also been made in previous modeling work [21]. Another example of  
568 uncertainties in model construction is the formulation of the sexual reproduction model.  
569 We assumed monogamy, but made some obvious simplifications, as explained in the  
570 results section. There are different assumptions that can be made in models that  
571 describe sexual reproduction, but the most important feature in the current context is  
572 that the reproduction rate of the offspring is not simply a copy of one of the parents, but  
573 represents the average of the two parents. This provides an additional mechanism of  
574 cultural change. Finally, only two types of communication networks have been  
575 considered in the agent based models here, the one where individuals interact with  
576 everyone else in the population, and the one where only interactions among nearest  
577 neighbors are allowed. A large variety of more realistic, random communication  
578 networks can be constructed, but we do not expect the results to differ from the ones  
579 obtained from the two extreme cases of networks considered here.

580

581         While some details of the model processes could be formulated in different ways,  
582 we have considered a range of models with different assumptions: with and without  
583 spatial restrictions, in the presence or absence of age structure, with sexual versus  
584 asexual reproduction, with different ways in which cultural transmission changes the  
585 reproduction rate, and in models with different population structure. In all models, the  
586 death rate of the population was identified as a crucial factor that determined whether  
587 cultural transmission of a fertility-reducing trait was successful or not, which could have

588 implications for understanding the forces that contribute to the occurrence of  
589 demographic transitions and that drive the decline of fertility below replacement levels in  
590 developed countries.

591

592

593 **Acknowledgements:** We would like to thank Simon Levin for useful discussions that  
594 helped shape this manuscript.

595

596

597

598 **Figure legends:**

599 **Figure 1.** Time series showing the different outcomes according to ABM1. Individual  
600 realizations are shown. (A) Higher death rates: fast reproducers persist and slow  
601 reproducers go extinct on a short time scale. (B) Lower death rates: slow reproducers  
602 persist and fast reproducers go extinct on a short time scale. (C) Intermediate death  
603 rates: both fast and slow reproducers persist for significantly longer time periods.  
604 Eventually one population goes extinct due to the stochastic nature of the simulation.  
605 Parameters were chosen as follows.  $R_f=0.005$ ;  $R_s=0.8R_f$ ;  $C=0.0008$ ;  $Q=0.93$ . For (A),  
606  $D=0.001$ . For (B),  $D=0.0001$ . For (C),  $D=0.00025$ .

607

608 **Figure 2.** Time to competitive exclusion, as a function of the death rate. (A) Model  
609 ABM1. Individual realizations of the computer simulation were run until one of the two  
610 populations (fast or slow reproducers) went extinct. This time was recorded with a green  
611 dot if the fast reproducer went extinct, and with a purple dot if the slow reproducer went  
612 extinct, as a function of the population death rate,  $D$ . For low death rates, there are only  
613 green dots, corresponding to the slow reproducer persisting and the fast reproducer  
614 going extinct relatively fast. For fast death rates, there are only purple dots,  
615 corresponding to the fast reproducers persisting and the slow reproducers going extinct  
616 in a relatively fast time scale. For intermediate death rates, the time until one of the  
617 populations goes extinct becomes sharply longer, and either population can go extinct  
618 first. This corresponds to long-term coexistence. For plot (i), parameters were chosen  
619 as follows:  $R_f=0.005$ ;  $R_s=0.8R_f$ ;  $C=0.0008$ ;  $Q=0.93$ . Plots (ii) and (iii) explore parameter  
620 dependence of the phenomenon. (ii) A higher value of  $Q=0.98$  makes it harder for the  
621 slow-reproduction trait to invade, hence requiring lower population death rates. (iii) A  
622 lower rate of cultural transmission,  $C=0.0004$ , makes it harder for the slow-reproduction  
623 trait to invade, hence again requiring lower population death rates. (B) Same, but  
624 according to ABM2 with age structure. Because each age class is characterized by its  
625 own death rate, we multiplied all those death rates by a variable factor  $F$ , and plotted  
626 the outcome against this parameter. The death rates for the age classes were:  
627  $D_1=0.00004$ ;  $D_2=0.00007$ ;  $D_3=0.00009$ ;  $D_4=0.0002$ . Other parameters are  $R=0.005$ ;  
628  $C=0.0008$ ;  $Q=0.93$ ;  $A=10,000$ .

629

630 **Figure 3.** Outcomes of ABM3 with a continuous reproduction strategy and cultural  
631 evolution. The average reproduction probability across the whole population is plotted  
632 over time. Individual simulation results are shown. Simulations were run for different  
633 death rates, decreasing from D1 to D8. For relatively high death rates, the average  
634 reproduction probability increases steadily towards maximal levels. For relatively low  
635 death rates, the average reproduction probability decreases steadily until population  
636 extinction occurs (due to the limited reproduction). For intermediate death rates, the  
637 average reproduction probability comes to oscillate around a steady value, which does  
638 not depend on initial conditions (not shown). Parameters were chosen as follows. Death  
639 rates are given by  $D1 = 0.002$ ,  $D2 = 0.001$ ,  $D3 = 4 \times 10^{-4}$ ,  $D4 = 3.75 \times 10^{-4}$ ,  $D5 = 3.6 \times 10^{-4}$ ,  
640  $D6 = 10^{-4}$ ,  $D7 = 5 \times 10^{-5}$ ,  $D8 = 10^{-5}$ . The reproduction probability of the individuals,  $R$ , was  
641 allowed to evolve, starting from  $R=0.05$  for all individuals.  $C=0.0003$ ;  $Q=0.965$ . The  
642 chance to make a mistake during cultural transmission (“mutation”)  $u=0.1$ . In case of a  
643 mistake, the average reproduction rate was changed by  $G=2\%$ .

644

645 **Figure 4.** Outcomes of ABM4 with continuous reproduction strategies, cultural  
646 evolution, and sexual reproduction. Simulations are in principle the same as those  
647 presented in Figure 3, but using the model with sexual reproduction. Assumed death  
648 rates decrease from D1 to D8. Results remain robust. Parameters were chosen as  
649 follows. Death rates are given by  $D1 = 0.002$ ,  $D2 = 0.001$ ,  $D3 = 7.5 \times 10^{-4}$ ,  $D4 = 7 \times 10^{-4}$ ,  $D5$   
650  $= 6.5 \times 10^{-4}$ ,  $D6 = 5 \times 10^{-4}$ ,  $D7 = 2.5 \times 10^{-4}$ ,  $D8 = 1 \times 10^{-4}$ . The reproduction probability of the  
651 individuals,  $R$ , was allowed to evolve, starting from  $R=0.05$  among all individuals. The

652 population death rate,  $D$ , is indicated in the graphs.  $u=0.1$ ,  $M=0.9$ ;  $C=0.0003$ ;  $Q=0.965$ ;  
653  $G=0.1$ ;  $G=2\%$ .

654

655 **Figure 5.** Computer simulations of the deme model, described in the text. (A) The slow-  
656 reproducing population (green) goes extinct and the fast-reproducing population  
657 (purple) continues to grow. Parameter values were chosen as follows:  $r_f=0.08$ ,  $r_s=0.04$ ,  
658  $d=0.03$ ,  $\beta=0.02$ ,  $K=10$ ,  $\alpha=0.01$ ,  $\varepsilon=0.01$ . (B) The fast-reproducing population is going  
659 extinct, and the slow-growing population takes over and continues to grow. The same  
660 parameter values were used, except  $d=0.003$ . (C) Simulation of the demographic  
661 transition process. Again, fast and slow reproducers are shown in purple and green,  
662 respectively. The total population size is shown by the dashed red line. The simulation  
663 is started with a death rate  $d=0.006$ . In this regime, the fast-reproducing population has  
664 the advantage and is dominant. The cultural spread of the low-fertility trait is not  
665 successful. At a defined time point, the death rate is reduced 1.8 fold every half  
666 generation until it has fallen to a value of  $d=0.001$  (grey line). This creates conditions  
667 under which the cultural transmission of the fertility-reducing trait is successful, and the  
668 population characterized by a slow reproduction rate spreads. This leads to a decline in  
669 the average reproduction rate of the population (black line), which is delayed with  
670 respect to the reduction in the death rate. For the parameter regime considered, the  
671 average reproduction rate is halved within about 2-3 generations, which corresponds to  
672 about 50-100 years (a generation in the model is given by  $1/r$ ). The remaining  
673 parameters are given as follows.  $r_f=0.008$ ,  $r_s=0.0016$ ,  $\beta=0.2$ ,  $K=10$ ,  $\alpha=0.01$ ,  $\varepsilon=0.01$ .

674



## 675 **References**

- 676 1. Borgerhoff Mulder M (1998) The demographic transition: are we any closer to an evolutionary  
677 explanation? *Trends Ecol Evol* 13: 266-270.
- 678 2. Caldwell JC (2006) *Demographic Transition Theory*. Dordrecht, The Netherlands.: Springer.
- 679 3. Coale AJ (1989) Demographic transition. In: Eatwell J, Milgate M, Newman P, editors. *Social*  
680 *Economics*. London.: Palgrave Macmillan UK.
- 681 4. Kirk D (1996) *Demographic Transition Theory*. *Population Studies* 50: 361-387.
- 682 5. Castles FG (2003) Castles, Francis G. "The world turned upside down: below replacement fertility,  
683 changing preferences and family-friendly public policy in 21 OECD countries. *Journal of*  
684 *European social policy* 13: 209-227.
- 685 6. Goldstein J, Lutz W, Testa MR (2003) The emergence of sub-replacement family size ideals in Europe.  
686 *Population Research and Policy Review* 22: 479-496.
- 687 7. Vining DR (1986) Social versus reproductive success – the central theoretical problem of human  
688 sociobiology. *Behav Brain Sci* 9: 167-260.
- 689 8. Thompson V, Roberge MC (2015) An Alternative Visualization of the Demographic  
690 Transition Model. *Journal of Geography* 114: 254-259.
- 691 9. Lee R (2003) The Demographic Transition: Three Centuries of Fundamental Change. *Journal of*  
692 *Economic Perspectives* 17: 167-190.
- 693 10. Aarssen LW (2005) Why Is Fertility Lower in Wealthier Countries? The Role of Relaxed Fertility-  
694 Selection. *Population and Development Review* 31: 113-126.
- 695 11. Wilson C (1999) Wilson, Chris. "Evolutionary theory and historical fertility change. *Population and*  
696 *development review* 25: 531-541.
- 697 12. Cavalli-Sforza LL, Feldman MW (1981) *Cultural Transmission and Evolution: A Quantitative Approach*.  
698 Princeton, NJ.: Princeton University Press.
- 699 13. Creanza N, Kolodny O, Feldman MW (2017) Cultural evolutionary theory: How culture evolves and  
700 why it matters. *Proc Natl Acad Sci U S A*.
- 701 14. Feldman MW, Cavalli-Sforza LL (1976) Cultural and biological evolutionary processes, selection for a  
702 trait under complex transmission. *Theor Popul Biol* 9: 238-259.
- 703 15. Boyd R, Richerson PJ (1985) *Culture and the evolutionary process*. . Chicago, IL: University of Chicago  
704 Press.
- 705 16. Bisin A, Verdier T (2001) The Economics of Cultural Transmission and the Dynamics of Preferences.  
706 *Journal of Economic theory* 97: 298-319.
- 707 17. Ehrlich PR, Levin SA (2005) The evolution of norms. *PLoS Biol* 3: e194.
- 708 18. Durrett R, Levin SA (2005) Can stable social groups be maintained by homophilous imitation alone?  
709 *Journal of Economic Behavior & Organization* 57: 267-286.
- 710 19. Nakamaru M, Levin SA (2004) Spread of two linked social norms on complex interaction networks. *J*  
711 *Theor Biol* 230: 57-64.
- 712 20. Fogarty L, Creanza N, Feldman MW (2013) The role of cultural transmission in human demographic  
713 change: an age-structured model. *Theor Popul Biol* 88: 68-77.
- 714 21. Ihara Y, Feldman MW (2004) Cultural niche construction and the evolution of small family size. *Theor*  
715 *Popul Biol* 65: 105-111.
- 716 22. Borenstein E, Kendal J, Feldman M (2006) Cultural niche construction in a metapopulation. *Theor*  
717 *Popul Biol* 70: 92-104.
- 718 23. Liggett TM (1999) *Stochastic interacting systems: contact, voter, and exclusion processes*. Berlin:  
719 Springer.

- 720 24. McCallum H, Barlow N, Hone J (2001) How should pathogen transmission be modelled? Trends in  
721 Ecology & Evolution 16: 295-300.
- 722 25. Kermack WO, McKendrick AG (1927) Contributions to the mathematical theory of epidemics – I. Proc  
723 R Soc Med 115A: 700-721.
- 724 26. Heesterbeek JA (2002) A brief history of  $R_0$  and a recipe for its calculation. Acta Biotheor 50: 189-  
725 204.
- 726 27. Charlesworth B (1980) Evolution in age-structured populations. Cambridge, UK: Cambridge  
727 University Press.
- 728 28. Webb C (2003) A complete classification of Darwinian extinction in ecological interactions. Am Nat  
729 161: 181-205.
- 730 29. Lutz W, Rita Testa M, Penn DJ (2006) Population density is a key factor in declining human fertility.  
731 Population and Environment 28: 69-81.
- 732 30. Katz E, Felix P (1955) Personal Influence; the Part Played by People in the Flow of Mass  
733 Communications. Glencoe, IL: Free Press.
- 734 31. Grewal R, Mehta R, Kardes FR (2000) The Role of the Social-Identity Function of Attitudes in  
735 Consumer Innovativeness and Opinion Leadership. Journal of Economic Psychology 21: 233-252.
- 736 32. Bernardi L, Klärner A (2014) Social networks and fertility. Demographic research 30: 641-670.
- 737 33. Nakayama S, Krasner E, Zeno L, Porfiri M (2019) Social information and spontaneous emergence of  
738 leaders in human groups. Journal of The Royal Society Interface 16: 20180938.
- 739
- 740

- Fast reproducer
- Slow reproducer

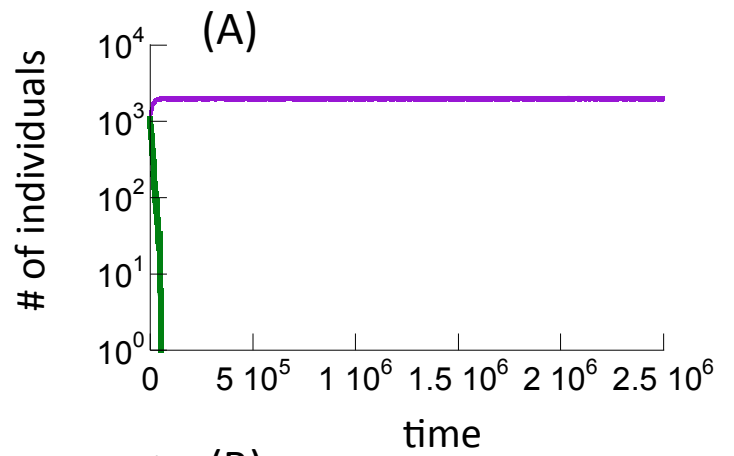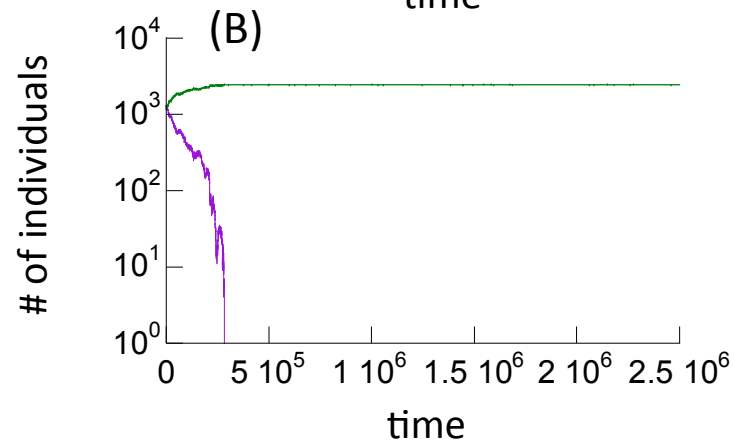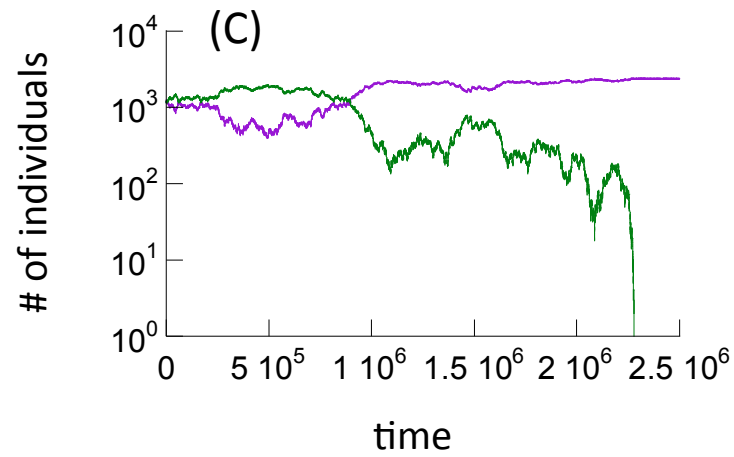

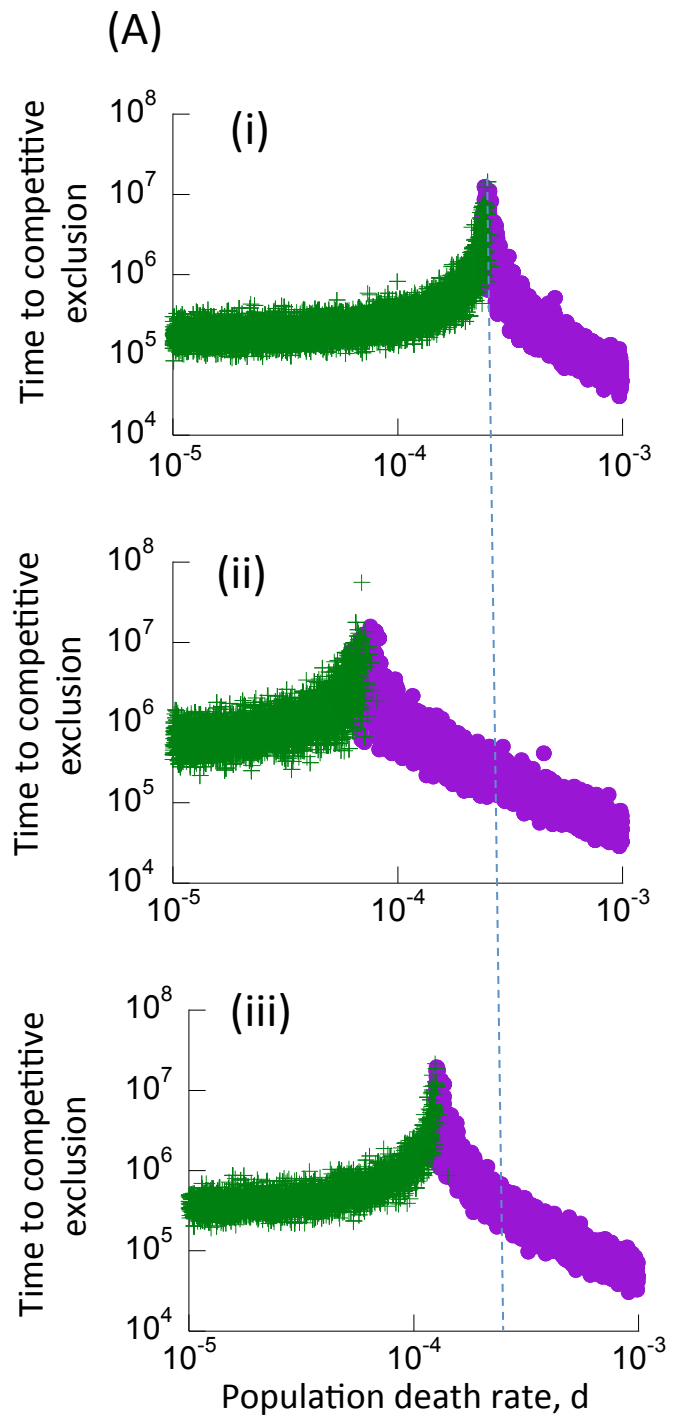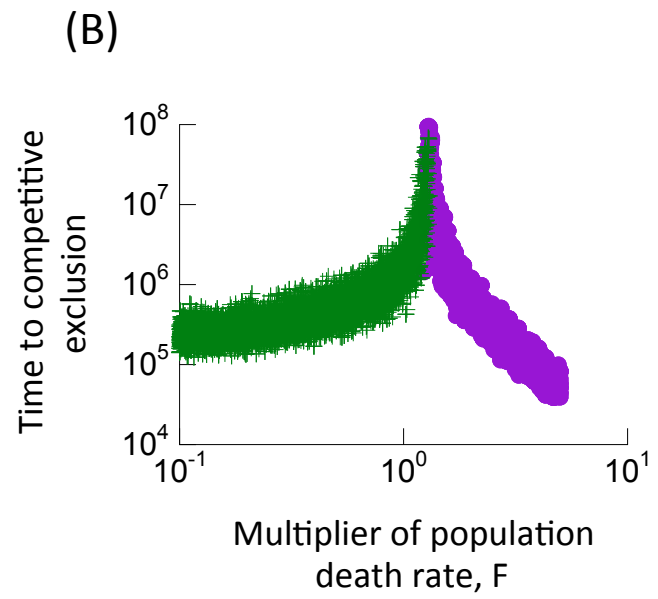

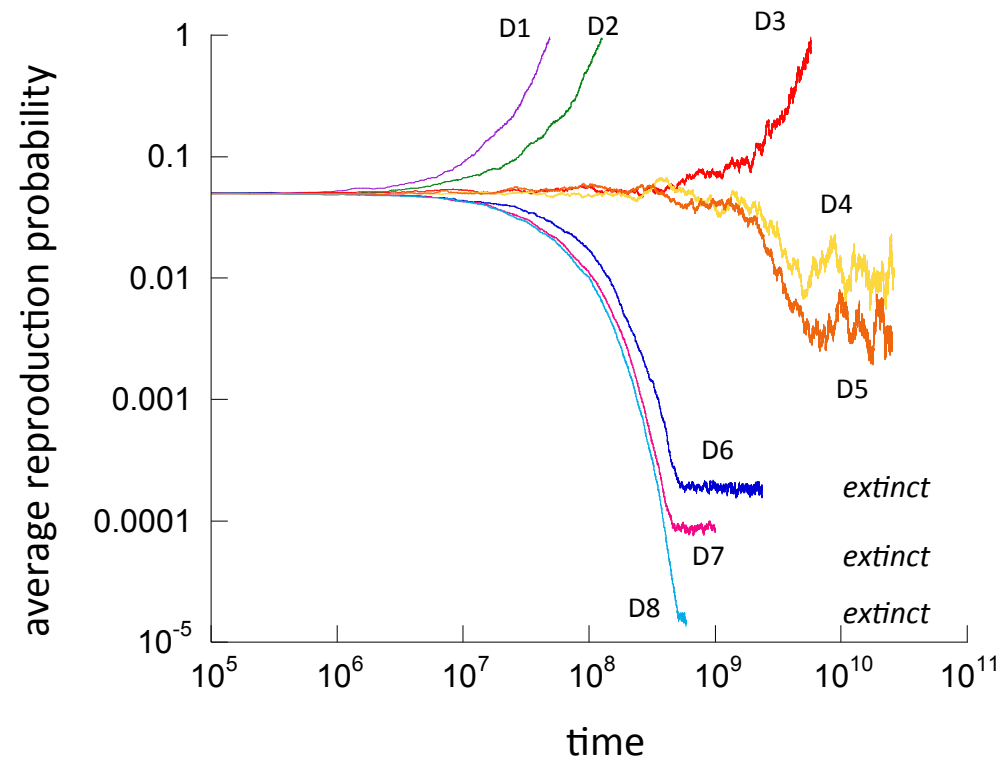

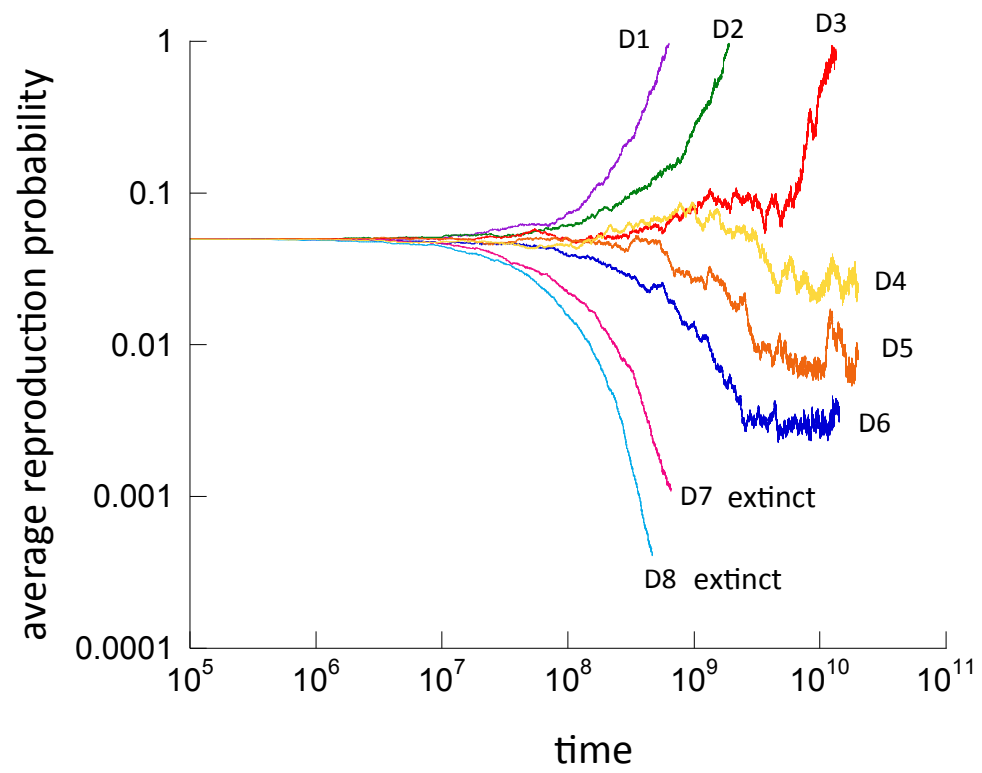

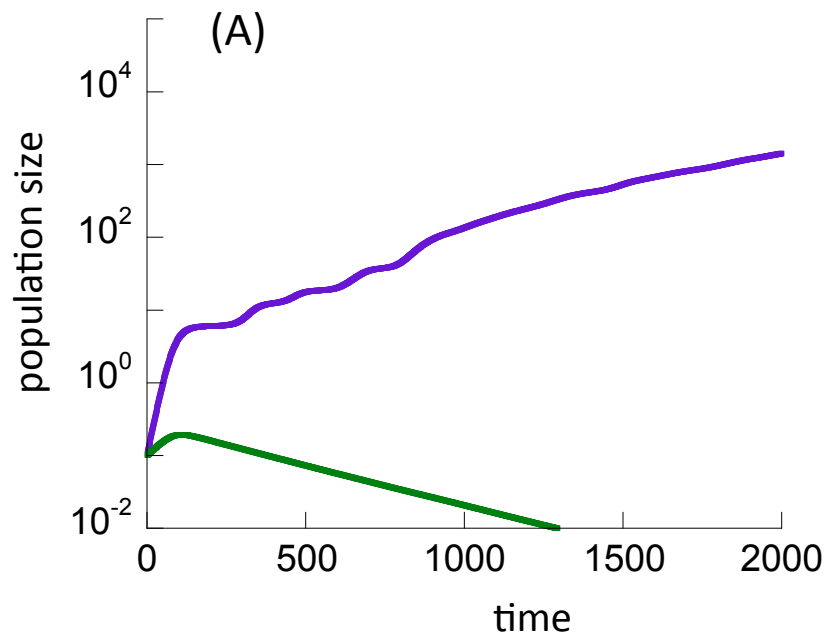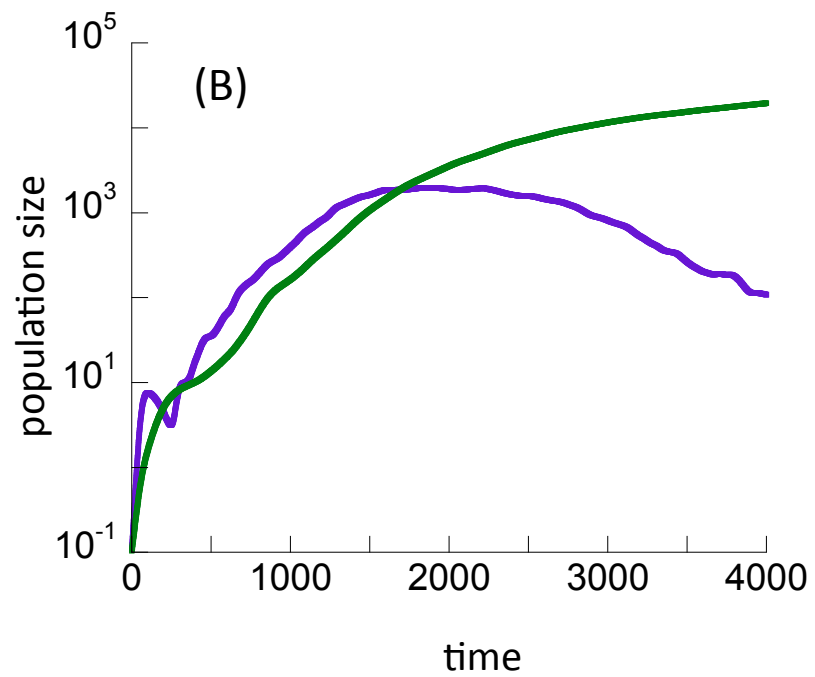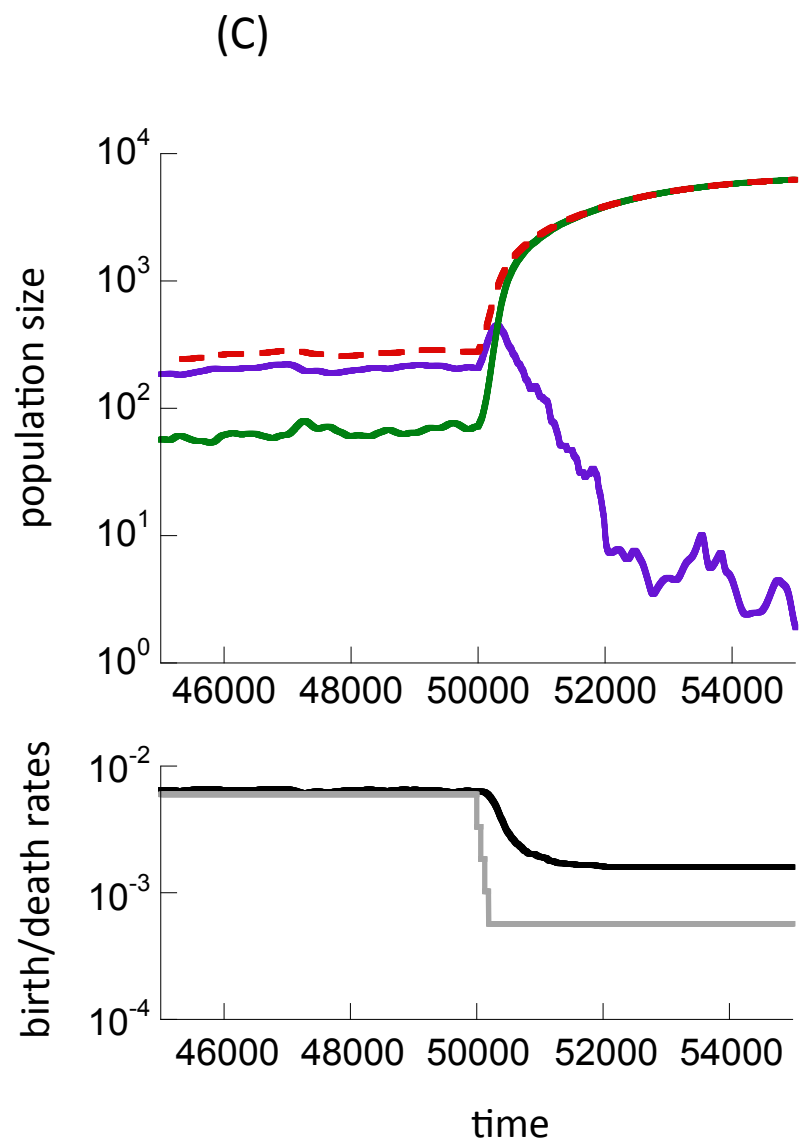

# Evolutionary dynamics of culturally transmitted, fertility-reducing traits

Dominik Wodarz, Shaun Stipp, Natalia L. Komarova

## Supplementary information

### Contents

|          |                                                      |           |
|----------|------------------------------------------------------|-----------|
| <b>1</b> | <b>In the absence of age structured dynamics</b>     | <b>1</b>  |
| 1.1      | The basic ODE model . . . . .                        | 1         |
| 1.2      | Other ODE models . . . . .                           | 3         |
| <b>2</b> | <b>Age structured dynamics</b>                       | <b>5</b>  |
| 2.1      | Model formulation . . . . .                          | 5         |
| 2.2      | System behavior . . . . .                            | 6         |
| 2.3      | A two-age system . . . . .                           | 8         |
| <b>3</b> | <b>Birth-death, imitation, and mutation dynamics</b> | <b>10</b> |
| 3.1      | Model formulation and numerical results . . . . .    | 10        |
| 3.2      | Analytical considerations . . . . .                  | 12        |

## 1 In the absence of age structured dynamics

### 1.1 The basic ODE model

Let us describe the dynamics of two competing types of individuals, fast reproducers and slow reproducers. We will denote the population of the former type as  $x^{(1)}$  and the population of the latter type as  $x^{(2)}$ . We have

$$\dot{x}^{(1)} = r_1 x^{(1)} W - dx^{(1)} - \beta x^{(1)} x^{(2)} / K, \quad (1)$$

$$\dot{x}^{(2)} = r_2 x^{(2)} W - dx^{(2)} + \beta x^{(1)} x^{(2)} / K. \quad (2)$$

Here, each type reproduces with its own linear reproduction rate, with

$$r_1 > r_2,$$



and the competition is expressed by term  $W$ , which for example can take the logistic form,

$$W = 1 - \frac{x^{(1)} + x^{(2)}}{K},$$

where  $K$  denotes carrying capacity. Both types die with equal rates,  $d$ . There is also a probability of switching from one type to the other, which is proportional to the abundance of the individual of the opposite type. So, the total rate at which type 1 switches to type 2 is given by

$$\beta_1 x^{(1)} \frac{x^{(2)}}{x^{(1)} + x^{(2)}},$$

and the total rate at which type 2 switches to type 1 is given by

$$\beta_2 x^{(2)} \frac{x^{(1)}}{x^{(1)} + x^{(2)}}.$$

If we assume that  $\beta_1 > \beta_2$  and denote  $\beta = \beta_1 - \beta_2$ , we have term

$$\beta x^{(1)} \frac{x^{(2)}}{x^{(1)} + x^{(2)}}$$

with the minus sign in the equation for  $x^{(1)}$ , and the same term with the plus sign in the equation for  $x^{(2)}$ . These terms are equivalent in form to frequency dependent infection. It turns out that for our analysis, the frequency dependence is not essential, and we can assume that switching occurs at a rate proportional to the abundance of the opposite type (scaled by the carrying capacity), not its percentage in the population. Therefore we will use equations of the form (1-2). The main assumptions are that

- Type 1 grows faster than type 2,  $r_1 > r_2$ , and
- There are more individuals switching from type 1 to type 2 than the other way around, that is,  $\beta > 0$ .

System (1-2) has four steady states.

0. The trivial solution,  $x^{(1)} = x^{(2)} = 0$  is unstable as long as  $r_1 > d$  and  $r_2 > d$ . We will assume that both types are viable and the above inequalities hold.

1. Type 1 (fast reproducers) wins:

$$x^{(1)} = K(1 - d/r_1), \quad x^{(2)} = 0.$$

This solution is stable if

$$d > d_1 \equiv \frac{r_1}{1 + (r_1 - r_2)/\beta}.$$

2. Type 2 (slow reproducers) wins:

$$x^{(1)} = K(1 - d/r_1), \quad x^{(2)} = 0.$$

This solution is stable if

$$d < d_2 \equiv \frac{r_2}{1 + (r_1 - r_2)/\beta}.$$

Note that  $d_2 < d_1$ .

3. Coexistence solution,

$$x^{(1)} = \frac{K}{\beta}(d - d_2), \quad x^{(2)} = \frac{K}{\beta}(d_1 - d).$$

This solution is positive as long as

$$d_2 < d < d_1. \tag{3}$$

The characteristic polynomial is given by

$$\lambda^2 + \frac{d(r_1 - r_2)}{\beta}\lambda + \frac{\beta + r_1 - r_2}{\beta}(d_1 - d)(d - d_2),$$

and the eigenvalues have negative real part as long as the free term is positive, which is only satisfied by condition (3), which means that inequality (3) is the stability condition for the coexistence solution.

## 1.2 Other ODE models

In the model just considered the conversion process is described by the term

$$\beta x^{(1)} x^{(2)} / K.$$

Alternatively, this term can be formulated as

$$\beta \frac{x^{(1)}x^{(2)}}{x^{(1)} + x^{(2)}}, \quad (4)$$

where the conversion happens proportionally to the current fraction of the individuals of the opposite type. In this case, we have a very similar solution structure. The competitive exclusion solutions are the same as in the previous model, the threshold  $d$  values are given by

$$d_1 = \frac{\beta}{1 - r_2/r_1}, \quad d_2 = \frac{\beta}{r_1/r_2 - 1},$$

and the coexistence solution is given by

$$x^{(1)} = \frac{K}{\beta} \left(1 - \frac{\beta}{r_1 - r_2}\right) (d - d_2), \quad x^{(2)} = \frac{K}{\beta} \left(1 - \frac{\beta}{r_1 - r_2}\right) (d_1 - d).$$

In a different modeling approach we assume that conversion happens at the same rate for both strategies, but it isn't proportional to the weighted fraction of the two strategies in the population. Assuming that strategy 1 is weighed with coefficient  $\gamma < 1$ , we obtain that the change in numbers for strategy 1 is given by

$$\beta(1 - \gamma) \frac{x^{(1)}x^{(2)}}{\gamma x^{(1)} + x^{(2)}}. \quad (5)$$

In this case, the competitive exclusion solutions are the same as in the previous model, the threshold  $d$  values are given by

$$d_1 = \frac{\beta(1 - \gamma)}{\gamma(1 - r_2/r_1)}, \quad d_2 = \frac{\beta(1 - \gamma)}{r_1/r_2 - 1},$$

and the coexistence solution is given by a somewhat different expression,

$$\begin{aligned} x^{(1)} &= \frac{K}{\beta + d} \left( \frac{\beta}{r_1 - r_2} + \frac{\beta + d}{\gamma r_2 - r_1} \right) \left( \beta + d + \frac{r_1 - \gamma r_2}{\gamma - 1} \right), \\ x^{(2)} &= \frac{K}{\beta + d} \left( \frac{d\gamma}{\gamma - 1} + \frac{\beta(\beta + d - r_1)}{r_2 - r_1} - \frac{(\beta + d)^2\gamma}{\gamma r_2 - r_1} \right). \end{aligned}$$

## 2 Age structured dynamics

### 2.1 Model formulation

We will model the competition dynamics of two types that differ by their reproductive strategies. Assume the existence of  $N$  discrete age groups for the two types, and denote the abundance of type  $s$  in age group  $i$  as  $x_i^{(s)}$ . Reproduction behavior of type  $s$  is described by the vector  $a_i^{(s)}$ , with entries in  $[0, 1]$  denoting relative rate of reproduction of this type in age  $i$ . Individuals of the first type,  $s = 1$ , correspond to “fast reproducers”, and the second type,  $s = 2$ , to the “slow reproducers” in the previous section. The latter type generally has a tendency to reproduce later than individuals of type 1. In the approach implemented here, type  $s$  is characterized by two integers,  $i_{start}^{(s)}$  and  $i_{end}^{(s)}$ , denoting the first and last age groups where reproduction is possible. We have

$$a_i^{(s)} > 0 \text{ if } i_{start}^{(s)} \leq i \leq i_{end}^{(s)}, \quad a_i^{(s)} = 0 \text{ otherwise,}$$

where

$$i_{start}^{(1)} < i_{start}^{(2)}.$$

We can formulate a discrete time dynamical system for these populations as follows:

$$x_1^{(s)}(t+1) = \sum_{i=1}^N a_i^{(s)} x_i^{(s)}(t) W, \quad (6)$$

$$x_j^{(s)}(t+1) = w_{j-1}^{(s)} x_{j-1}^{(s)}(t) \left( 1 - \beta_j^{(s)} \frac{\sum_{k=j}^N x_k^{(3-s)}(t)}{\sum_{k=j}^N (x_k^{(3-s)}(t) + x_k^{(s)}(t))} \right) + w_{j-1}^{(3-s)} x_{j-1}^{(3-s)}(t) \beta_j^{(3-s)} \frac{\sum_{k=j}^N x_k^{(s)}(t)}{\sum_{k=j}^N (x_k^{(3-s)}(t) + x_k^{(s)}(t))}, \quad 1 < j \leq N, \quad (7)$$

where the competition term  $W$  can be defined as

$$W = 1 - \frac{\sum_{s=1}^2 \sum_{k=1}^N x_k^{(s)}}{K} \quad \text{or} \quad (8)$$

$$W = \left( 1 + \frac{\sum_{s=1}^2 \sum_{k=1}^N x_k^{(s)}}{K} \right)^{-1}. \quad (9)$$

Equation (6) describes reproduction. Different age groups reproduce with their own rate  $s_i^{(s)}$ , and the offspring enters age group 1. Equation (7) describes the population moving from age group to age group. Coefficients  $w_{j-1}^{(s)}$  describe the probability for an individual of type  $s$  to survive until age  $j$ . The probability of switching type is described by terms including coefficient  $\beta$ . First we note that expression  $3 - s$  for  $s \in \{1, 2\}$  simply returns the type different from type  $s$ , because  $3 - s$  gives 2 if  $s = 1$  and it gives 1 if  $s = 2$ . The probability to switch from type  $s$  to type  $3 - s$  while transitioning to age group  $j$  is given by

$$\beta_j^{(s)} \frac{\sum_{k=j}^N x_k^{(3-s)}(t)}{\sum_{k=j}^N (x_k^{(3-s)}(t) + x_k^{(s)}(t))},$$

and is proportional to the fraction of individuals of age  $j$  and older that belong to class  $3 - s$ . With this in mind, we can see that the first term on the right of equation (7) multiplies the probability that an individual does not switch to the other type, and the second term multiplies the probability that switching from  $3 - s$  to  $s$  occurs. System (6-7) assumes no switching at the first stage. To include switching at the first stage, we replace equation (6) with

$$\begin{aligned} x_1^{(s)}(t+1) &= \sum_{i=1}^N a_i^{(s)} x_i^{(s)}(t) W \left( 1 - \beta_1^{(s)} \frac{\sum_{k=1}^N x_k^{(3-s)}(t)}{\sum_{k=1}^N (x_k^{(3-s)}(t) + x_k^{(s)}(t))} \right) \\ &+ \sum_{i=1}^N a_i^{(3-s)} x_i^{(3-s)}(t) W \beta_1^{(3-s)} \frac{\sum_{k=1}^N x_k^{(s)}(t)}{\sum_{k=1}^N (x_k^{(3-s)}(t) + x_k^{(s)}(t))}. \end{aligned} \quad (10)$$

## 2.2 System behavior

System (10, 7) has two exclusion steady states (for  $s = 1$  and  $s = 2$ ), which for competition model (9) are given by

$$x_j^{(s)} = K \prod_{k=1}^{j-1} w_k^{(s)} \frac{r \sum_{m=1}^N a_m^{(s)} \prod_{k=1}^{m-1} w_k^{(s)} - 1}{\sum_{m=1}^N \prod_{k=1}^{m-1} w_k^{(s)}}, \quad 1 \leq j \leq N, \quad (11)$$

$$x_j^{(3-s)} = 0, \quad 1 \leq j \leq N. \quad (12)$$

In figure 1 the behavior of a system with  $N = 5$  stages is shown. We assumed that for fast reproducers,  $i_{start}^{(1)} = 2$ , and for slow reproducers,  $i^{(2)} = 3$ ,

while  $i_{end}^{(s)} = 5$  for both types. For simplicity we assumed that within the reproductive stages, the values  $a_i^{(s)}$  were equal to a constant (independent on type and stage). Further, we assumed that the rates  $w_i^{(s)}$  were  $s$ - and  $i$ -independent, and transfer coefficients  $\beta_i^{(s)}$  were  $i$ -independent (but dependent on  $s$ ).

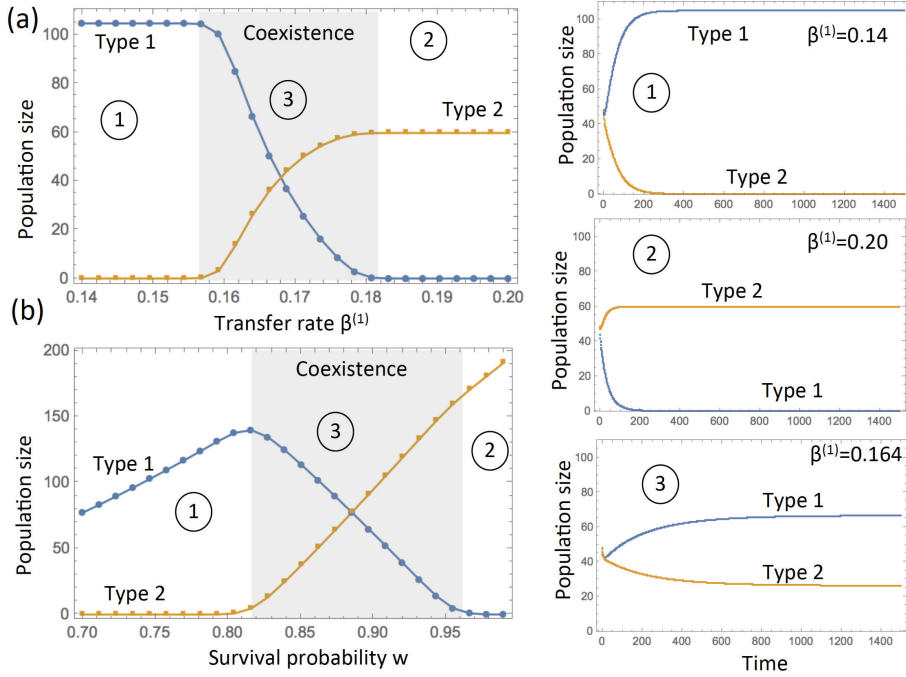

Figure 1: Age structured dynamics according to system (10, 7), numerical simulations. Total populations of individuals of type 1 and type 2 are presented. The steady state values are given on the left as functions of parameter (a)  $\beta^{(1)}$  and (b)  $w_i^{(s)} = w$  for all  $s \in \{1, 2\}, 1 \leq i \leq N$ , the survival probability. Solution types are denoted by a circled number. The parameters are  $w = 0.9$  in (a),  $\beta^{(1)} = 0.17$  in (b), and  $K = 50, \beta_i^{(2)} = 0.1$ . The reproductive rate  $a_i^{(s)} = 1$  when  $2 \leq i \leq 5$  for  $s = 1$  and  $3 \leq i \leq 5$  for  $s = 2$ . Initially, all populations  $x_i^{(s)} = 10$ .

In figure 1(a), by fixing all the parameters except for  $\beta^{(1)}$ , we observed that three different solution types were stable. Solution 1 corresponds to the fast reproducers excluding the slow reproducers and is stable for smaller values transfer away from type 1,  $\beta^{(1)}$ . Solution 2 corresponds to the slow reproducers excluding the fast reproducers, and corresponds to larger  $\beta^{(1)}$ . For intermediate values of  $\beta^{(1)}$  we observe stable coexistence of both types. Sam-

ple time series of the three solution types (corresponding to three different values of  $\beta^{(1)}$ ) are presented on the right on the figure.

Alternatively, if we fix  $\beta^{(1)} > \beta^{(2)}$  and vary the survival probability,  $w$ , the same three solution types are observed, 1(b). In particular, we note that low survival rates (that is, high death rates) lead to the dominance of fast reproducers, and high survival rate (low death rates) to the dominance of slow reproducers.

### 2.3 A two-age system

The simplest nontrivial system that captures the phenomenon of interest is system (10,7) with  $N = 2$ . Let us assume that  $w_j^{(s)} = w$  for both types (that is, mortality is the same for both types). Further, let

$$i_{start}^{(1)} = 1, \quad i_{end}^{(1)} = 2, \quad i_{start}^{(2)} = 2, \quad i_{end}^{(2)} = 2,$$

in other words, type 1 reproduces both in ages 1 and 2, and type 2 only reproduces in age 2. The trivial solution<sup>1</sup> is unstable if  $wa_2^{(2)} > 1$  or  $wa_2^{(1)} > 1 - a_1^{(1)}$ . The following are some of the non-trivial long-term solutions (compare to the equilibria of section 1):

1. Type 1 (fast reproducers) wins – a competitive exclusion steady state:

$$x_1^{(1)} = \frac{K[r(a_1^{(1)} + wa_2^{(1)}) - 1]}{1 + w}, \quad x_2^{(1)} = \frac{Kw[r(a_1^{(1)} + wa_2^{(1)}) - 1]}{1 + w}, \quad x_1^{(2)} = x_2^{(2)} = 0.$$

2. Type 2 (slow reproducers) wins – a competitive exclusion steady state:

$$x_1^{(1)} = x_2^{(1)} = 0, \quad x_1^{(2)} = \frac{K[ra_2^{(2)}w - 1]}{1 + w}, \quad x_2^{(2)} = \frac{Kw[ra_2^{(2)}w - 1]}{1 + w}.$$

3. A coexistence state.
4. Periodic solutions.

---

<sup>1</sup>For the analysis of the trivial solution one has to modify the original system by adding a small constant in the denominators of all the equations, otherwise we have a singularity which is meaningless, because the transfer terms multiplying  $\beta$  must be zero if the population is zero.

Stability of the two exclusion states can be investigated. For simplicity, let us set all nonzero values of fecundity to a constant,  $a_j^{(s)} = a$ . Further, we will assume that the coefficient of transfer is independent of the age, and is only defined by the type:  $\beta_j^{(s)} = \beta^{(s)}$  for  $j = 1, 2$ ,  $s = 1, 2$ . Let us analyze stability of solution 1 above (fast reproducers win). Stability of the discrete system requires all the eigenvalues of the Jacobian to satisfy  $|\lambda| < 1$ . The eigenvalues are given by

$$\lambda_{1,2} = \frac{1 \pm \sqrt{1 + 4rw(1+w)^2}}{2r(1+w)^2}, \quad (13)$$

$$\lambda_{3,4} = \frac{\beta^{(1)}(2+w) \pm \sqrt{w[w(2+\beta^{(1)} - 2\beta^{(2)})^2 + 4(1+\beta^{(1)} - \beta^{(2)})(1-\beta^{(2)})]}}{2(1+w)}. \quad (14)$$

The first two eigenvalues do not depend on the transfer rates and correspond to the stability of the type 1 population in the absence of the other population. We can show that  $|\lambda_{1,2}| \leq 1$  for all  $0 \leq w \leq 1$  and  $r \geq 1$ . In particular,  $\lambda_1 \geq 0$ , we have  $\lambda_1 = 1$  when  $r = 1, w = 0$ , it decays with  $r$  and  $w$  for  $r \leq 2$ , and for a given  $r > 2$ , it has a maximum value  $(1-w)/2$  when

$$r = \frac{2}{(w-1)^2(w+1)}.$$

Further,  $\lambda_2 \in (-1, 0]$  for all values  $w \in [0, 1]$  and  $r \geq 1$ , since  $\partial\lambda_2/\partial r > 0$ , and for  $r = 1$ ,  $\lambda_2 = 1 - \sqrt{1 + 4w(1+w)^2}/(2(1+w)^2) \in [1/8(1 - \sqrt{17}), 0]$ .

The eigenvalues  $\lambda_{3,4}$  describe stability against an invasion of type 2 individuals. The solution can become unstable if  $\lambda_3 > 1$ . This happens when

$$w > w_1 \equiv \frac{(1 - \beta^{(1)})^2}{(\beta^{(2)} - \beta^{(1)})(2 - \beta^{(2)})}.$$

Clearly, if  $\beta^{(1)}$  is large (close to 1), the type 1 solution is unstable (because of frequent transfers to type 2). In fact, as long as

$$\beta^{(1)} < \frac{4 - \beta^{(2)} - \sqrt{5(\beta^{(2)})^2 - 16\beta^{(2)} + 12}}{2},$$

the type 1 solution is stable for any values of  $w < 1$ , because  $w_1 > 1$ . If however the inequality above is reversed (that is, the transfer rate is larger



than a threshold for type 1), the solution becomes unstable for sufficiently large values of  $w$ .

Intuitively, fitness of each of the types is comprised of their net fecundity and their propensity to stay (and not transfer to the opposite type). Clearly, the fecundity of type 1 is larger than that of type 2. But this can be offset by a larger probability of transfer (if we assume that  $\beta^{(1)}$  is larger than  $\beta^{(2)}$  by a sufficient margin). Small death rates (and therefore large values of  $w$ ) work against type 1 individuals and benefit type 2 individuals. If  $w$  is large, more individuals survive to later stages (and thus type 2 has a better chance to reproduce). Further, for larger values of  $w$ , there will be a larger influx of individuals transferring from type 1 to type 2: they simply have a longer time to stay alive and decide to switch. Thus, living longer adds fitness to type 2, such that after a threshold of  $w$ , type 2 becomes stronger and drives type 1 extinct.

Investigating the stability of type 2 equilibrium, we discover that it is unstable (in this simple 2-age model) for all values of  $w$  except for  $w = 1$ , where it is neutral. Note that for systems with more age stages, this is not the case, and we have a stable type 2 equilibrium (see the previous section). For the 2-age system, for values  $w < 1$ , but close to 1, instead of equilibrium 1, we observe a stable cycle which contains only type 2 individuals.

## 3 Birth-death, imitation, and mutation dynamics

### 3.1 Model formulation and numerical results

Envisage the following process. In a 1D spatial system of a constant size,  $N$ , each individual,  $i$ , is characterized by a reproduction rate,  $l_i$ . During each time unit,  $N$  updates are performed, each consisting of two parts, a death-birth (DB) update and a cultural transmission (CT) update. Each update proceeds as follows:

- A DB update: An individual is chosen, randomly and fairly, to be removed (say, this is the individual at location  $i_1$ ). Then it is replaced by the progeny of one of its two neighbors: the individual at location

$i_1 + 1$  reproduces with probability  $l_{i_1+1}/(l_{i_1+1} + l_{i_1-1})$ , and the individual at location  $i_1 - 1$  reproduces with probability  $l_{i_1-1}/(l_{i_1+1} + l_{i_1-1})$ . The offspring inherits the reproduction rate of the parent.

- A CT update: this event happens with probability  $\beta$ , which sets the relative time scale of the two types of updates. Pick an individual, randomly and fairly, to perform an imitation update (say this is the individual at location  $i_2$ ). This individual will change its reproduction rate from  $l_2$  to

$$\tilde{l} = \frac{\sum_{j=i_2-1}^{i_2+1} \alpha_{i_2,j} l_j}{\sum_{j=i_2-1}^{i_2+1} \alpha_{i_2,j}},$$

where

$$\alpha_{i,j} = \begin{cases} 1, & l_j \leq l_i, \\ s, & l_j > l_i, \end{cases}$$

and  $0 < s < 1$  is a constant that indicates by how much the strategy of fast reproducers is discounted. In other words, a weighted average of all the strategies around the focal individual at  $i_2$  is formed, such that the strategy of those who reproduce faster than the focal individual is discounted with coefficient  $s$ . The focal individual adopts the resulting strategy with probability  $1 - u$ . With probability  $u$ , strategy  $\tilde{l}$  is increased or decreased (with equal likelihood) by an amount  $\Delta l$  (unless  $l < \Delta l$ , in which case it can no longer decrease). This process is equivalent to mutations, whereby the phenotype is modified with a certain probability to give rise to variation.

We would like to characterize the equilibrium of this system. First we note that in the absence of mutations ( $u = 0$ ), the state with  $l_i = l$  for all  $i$  is a equilibrium for any value of  $l$ . As a result, the system will converge to one of these neutral equilibria, depending, for example, on the initial condition.

The dynamics change drastically in the presence of mutations,  $u > 0$ . Now, uniform states are no longer equilibrium states, and the equilibrium reproduction rates will be distributed around some mean value,  $\bar{l}$ , with the variance that increases with  $u$  and  $\Delta l$ . In figure 2(a) we present the time series of the population mean reproduction rates, for 4 different values of  $\Delta l$ , the increment of the reproduction rate. We can see that the population settles to a stochastic equilibrium, where the mean population mean reproduction rate increases with  $\Delta l$ , and convergence time decreases with  $\Delta l$ . Figure 2(b) shows numerically obtained histograms of reproduction rates of populations

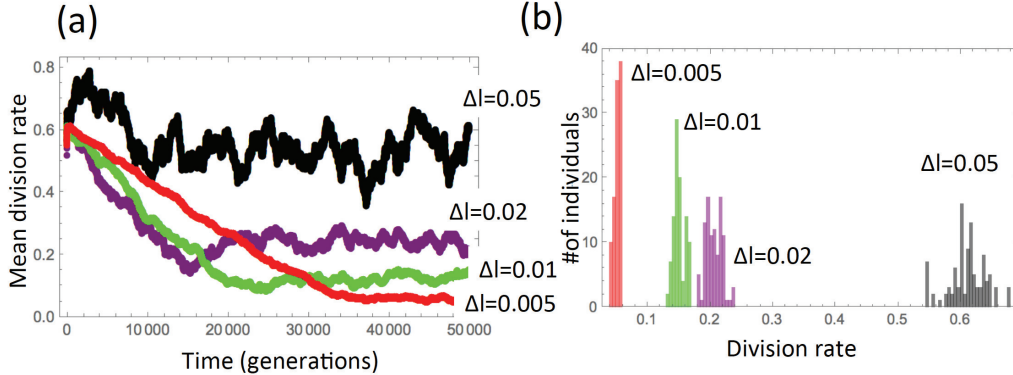

Figure 2: The dynamics of a 1D simulation with mutations. (a) The time-series of the population mean reproduction rate, for 4 different values of  $\Delta l$ . (b) Numerically obtained histograms of the population’s reproduction rates, taken at generation 50,000, for the same 4 values of  $\Delta l$ . The rest of the parameter are:  $N = 100$ ,  $u = 0.04$ ,  $\beta = 1$ ,  $s = 0.9$ .

at equilibrium, for the same four values of  $\Delta l$ . We can see that the standard deviation increases with  $\Delta l$ . Similar trends are observed when we vary the mutation rate,  $u$  (not shown). 2D simulations that show the same trends are shown in figure 3.

### 3.2 Analytical considerations

To find the mean equilibrium value of the reproduction rates, we use the following argument. Suppose that the equilibrium distribution<sup>2</sup> of the reproduction rates is given by  $\{f_k\}$ , such that the probability for an individual to have reproduction rate  $L_k$  is given by  $f_k$ , with

$$\sum_k f_k L_k = \bar{l}.$$

Under a BD event, suppose an individual at position  $i_1$  with reproduction rate  $L_1$  is picked for replacement, and suppose further than its two neighbors have reproduction rates  $L_2$  and  $L_3$ . Then the expected increment in the

<sup>2</sup>A similar argument for continuous distributions can be developed.

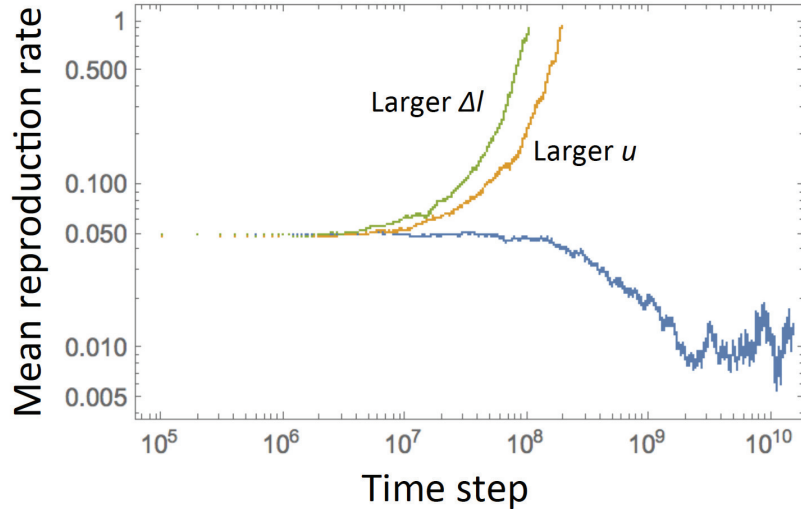

Figure 3: The dynamics of a 2D simulation with mutations. The population mean reproduction rate is plotted as a function of time, for 3 simulations. The blue line represents a base-line simulation with parameters  $u = 0.1, \Delta l/l = 0.02$ , the orange line a simulation with an increased mutation rate,  $u = 0.3$ , and the green line a simulation with an increased  $\Delta l/l = 0.04$ . The rest of the parameters are as in Fig.3 of the main text, with the death rate  $3.75 \times 10^{-4}$ .

reproduction rate of the focal individual is given by

$$-L_1 + L_2 \frac{L_2}{L_2 + L_3} + L_3 \frac{L_3}{L_2 + L_3}.$$

Averaging over all the possible reproduction rates, we obtain the expected increment in reproduction rate from a DB update:

$$\Delta L_{DB} = \sum_i \sum_j \sum_k \left( -l_i + \frac{l_j^2}{l_j + l_k} + \frac{l_k^2}{l_j + l_k} \right) f_i f_j f_k. \quad (15)$$

Similarly, we can calculate the expected increment in the reproduction rate resulting from a cultural transmission event:

$$\Delta L_{CT} = \sum_i \sum_j \sum_k \left( -l_i + \frac{l_i + \alpha_{ij} l_j + \alpha_{ik} l_k}{1 + \alpha_{ij} + \alpha_{ik}} \right) f_i f_j f_k. \quad (16)$$

The equation

$$\Delta L_{DB} = -\beta \Delta L_{CT} \quad (17)$$

characterizes the equilibrium. Note that the right hand side of this equation is positive, because the mean increment resulting from CT updates is negative, due to a diminished weight of high reproduction rates in the weighted averages. The left hand side is also positive, because DB updates tend to increase the reproduction rates due to competition among individuals.

Let us assume that the width of the distribution of the equilibrium reproduction rates is defined by the mutation rate (and the increment  $\Delta l$ ), and keep it fixed, while varying the mean  $\bar{l}$ . Note that in equation (16), the expression in the parentheses can be rewritten as

$$\frac{\alpha_{ij}(l_j - l_i) + \alpha_{ik}(l_k - l_j)}{1 + \alpha_{ij} + \alpha_{ik}}.$$

For each location  $i$ , let us present  $L_i = \bar{l} + \epsilon m_i$ , where all  $m_i$  are IID with a zero mean and a variance that we denote by  $(\sigma/\epsilon)^2$ . We can see that  $\bar{l}$  cancels from the above expression, and its statistics will only depend on the distribution width. In other words, the mean decrement received by the population reproduction rate as a result of a CT update is defined by the difference between the focal reproduction rate and a weighted average of its neighboring reproduction rates, and does not depend of the absolute value of the rates.

On the contrary, the DB increment defined by equation (15) depends on the magnitude of  $\bar{l}$ . Intuitively, neighbors compete for filling the empty spot, and the amount of advantage experienced by a neighbor with a higher reproduction rate is proportional to the relative, and not absolute, difference in the rates. Therefore, the increment scales with the relative amount of spread in reproduction rates, and is thus inversely proportional to  $\bar{l}$ . Again, for each location  $i$ , we present  $l_i = \bar{l} + \epsilon m_i$ , where all  $m_i$  are IID with a zero mean and variance  $(\sigma/\epsilon)^2$ . Then, expanding the expression in parentheses in (15) in terms of  $\epsilon$  we obtain

$$\left( \frac{m_j + m_k}{2} - m_i \right) \epsilon - \frac{\epsilon}{2} \frac{(m_j - m_k)^2}{m_j + m_k} \sum_{n=1}^{\infty} \left( -\frac{(m_j + m_k)\epsilon}{2\bar{l}} \right)^n.$$

The first term averages to zero, and the second term is given by

$$\frac{\epsilon^2}{4\bar{l}} (m_j - m_k)^2,$$

which upon averaging yields

$$\frac{\sigma^2}{2\bar{l}},$$

a quantity inversely proportional to the mean reproduction rate of the population. We further see that it depends on the square of  $\sigma$  in the lowest order.

From the above analysis it follows that the left hand side of equation (17) is a decaying function of  $\bar{l}$  which tends to zero as  $\bar{l} \rightarrow \infty$ , and the right hand side of equation (17) is  $\bar{l}$ -independent. There will be a unique intersection of the two curves as long as  $\beta$  is chosen to be sufficiently low. This intersection defines the equilibrium value of the population mean reproductive rate.

We further note that the quantities  $\Delta_{DB}$  and  $-\Delta_{CT}$  both grow with the distribution width of the reproduction rates, but while  $-\Delta_{CT}$  is linear in  $\sigma$ ,  $\Delta_{DB}$  is quadratic in this quantity, and thus grows faster as we increase the width of the distribution of  $l$ . Therefore, as  $u$  increases and the distribution width increases, the left hand side of equation (17) grows faster than the right hand side, resulting in an increase in the solution,  $\bar{l}$ .

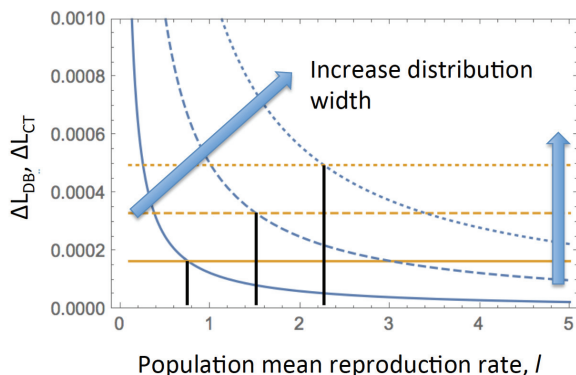

Figure 4: Finding the equilibrium reproduction rate by solving equation (17), illustrated with example (18-19). The left hand side of equation (17),  $\Delta L_{DB}$ , is shown as blue lines and the right hand side,  $-\beta\Delta L_{CT}$ , with yellow lines, as functions of  $\bar{l}$ . Solid, dashed, and dotted lines correspond to three different values of  $\Delta l$ : 0.05, 0.10, 0.15. The rest of the parameters are:  $s = 0.9$ ,  $\mu = 0.1$ ,  $\beta = 1$ .

This is illustrated in an example where we assumed that the division

rates are distributed according to the following three-valued distribution with mean  $\bar{l}$  and variance  $(\Delta l)^2\mu$ :

|                 |                |           |                |
|-----------------|----------------|-----------|----------------|
| $i \rightarrow$ | 1              | 2         | 3              |
| $L_i$           | $l - \Delta l$ | $l$       | $l + \Delta l$ |
| $f_i$           | $\mu/2$        | $1 - \mu$ | $\mu/2$        |

The expressions for  $\Delta L_{DB}$  and  $\Delta L_{CD}$  can be obtained explicitly,

$$\Delta L_{DB} = \frac{(\Delta l)^2\mu}{2\bar{l}} \frac{(\Delta l)^2\mu - 4\bar{l}^2}{(\Delta l)^2 - 4\bar{l}^2}, \quad (18)$$

$$\Delta L_{CT} = \frac{\Delta l\mu(1-s)}{6(2+s)(1+2s)} ((6-\mu)\mu s - 10s + \mu(3+\mu) - 8). \quad (19)$$

In figure 4, both sides of equation (17) are plotted as functions of  $\bar{l}$ , and their intersections are marked with vertical lines, for three values of  $\Delta l$ , which represent an increase in the distribution width. We can see that the corresponding solutions  $\bar{l}$  become larger for larger distribution widths.
